# Supplementary material for: Locating rock slope failures along highways and understanding theirphysical processes using seismic signals
Source: Copernicus journal article supplement (doi:10.5194/esurf-2020-94), 2020-12-02
Supplement: Supplementary file [file esurf-2020-94-AC1-supplement.pdf]

**Earth Surface Dynamics**

**Editor-in-Chief**

**Dr. Niels Hovius**

Date: February 9, 2021

**Earth Surface Dynamics Manuscript esurf-2020-94**

**“Locating rock slope failures along highways and understanding their physical processes using seismic signals”**

Dear Dr. Niels Hovius and Dr. Claire Masteller,

Thanks for handling our manuscript. We hereby submit the revised version of our manuscript for your further consideration. We would like to thank referees for the valuable comments, which we have all taken into account in our revision and certainly helped to clarify the presentation of our work. In the revised manuscript, all of our changes are by tracking. A point-by-point response to all the comments can be found below “Responses to Reviewer’s Comments”.

Thank you for your time and consideration, we hope very much that our revisions are satisfactory to you.

Yours sincerely,

Jui-Ming Chang, on behalf of all authors

## Responses to Reviewer's Comments

**Note:** Reviewer's comments are all quoted in their entirety and are in *Italics*, while authors' responses are in **blue**.

### **Reviewer 1#**

*The manuscript by Chang et al., is an excellent example of how rock slope failure events can be identified, reported and classified by exploiting regional seismic networks. The paper is well written and structured, analyses carefully carried on, figures appropriated and discussion about pros and cons well explained to the reader. References are also exhaustive. The authors have done a very good job in introducing the framework, explaining into details their procedure, as well as presenting the results of their test cases. I have enjoyed the reading and I believe that the manuscript is already suitable for publication as it is.*

**No response.**

## **Reviewer 2#**

*I have had the opportunity to fully review the manuscript “Locating rock slope failure along highways and understanding their physical processes using seismic signals.” After reading through this manuscript, I have found it interesting and progressive for its attempted to create a real-time warning system. That said, I think the manuscript needs some work and changes before it can be considered for publication. I noticed that this manuscript has been submitted to GRL in the past and thus may be the reason for some information and in-depth analysis to be missing. This paper will contribute to the overall mass flow community as an example of what can be completed in a specific area. Please address my comments and concerns below.*

### **Major comments:**

(1) ASL does need a priori values, you state they do not on Lines 75,157, etc.. To this extent what are you using for the ASL method for velocity, quality factor, frequency? Likewise, you need to explain how you are estimating "alpha" which contain the a priori values for ASL.

The basic idea of ASL method is based on the Equation (1), which represents the peak-amplitude at i-th station ( $A_i$ ) decay with increasing source-to-station distance ( $r_i$ ).  $A_0$  is the seismic amplitude at the source,  $\alpha$  accounts for anelastic attenuation of seismic waves, and n-value controls the amplitude attenuation due to geometric spreading (n=0.5 for surface wave, n=1 for body wave). In this study, we assume surface waves are the dominant seismic wave type induced by the rock slope failures, so the n-value in Equation (1) of 0.5 is used, which is a priori value in ASL only. Finally, there are only two unknown parameters ( $A_0$  and  $\alpha$ ) in Equation (1). Aforementioned unknown parameters can be inverted directly by fitting the amplitude decay curve with a least-square scheme. We have added text to clarify the above statement. See Lines 161-165.

$$A_i(r) = \frac{A_0}{r_i^n} e^{-\alpha r_i} \quad \text{Equation (1)}$$

$A_i(r)$  : the peak-amplitude at i-th station

$r_i$  : source-to-station distance (km)。

$A_0$  : seismic amplitude at the event source。

$\alpha$ : anelastic attenuation of seismic waves。

n: parameters (n=0.5 for surface wave, n=1 for body wave)

(2) Source location methods like ASL are influenced by site and path effects, did you try and correct for these? It may reduce some of the large location errors that are shown. If not, there needs to be a statement of why the stations were not corrected.

We appreciate very much the Reviewer’s thoughtful comments. For ASL, several factors such as station geometry, path effects and site amplification may contribute to the location errors. Our results demonstrated that a well-distributed epicentral distance is a crucial factor for the ASL method. We have taken the path effect into account ( $\alpha$  is an unknown parameter in our study), and details in discussion can be found in Lines 232-235 and S4 chapter in Supplementary. For the site amplification, previous study has demonstrated that the site amplification could strongly influence the location result (Walsh et al., 2017). At local-scale area, site amplification factors for the specific station can be estimated easily by the ratios of coda amplitudes relative to a reference station (Kumagai et al., 2009). However, the aim of this study is to propose a rapid

system to provide information about the timing, location, and moving volume of such events within a short time to highway authority. For the seismic stations along highways, it is difficult to select a reference station, which will be a challenge to comprehensively investigate the site amplification based on the method adopted in Kumagai et al. (2009). In Taiwan, recent studies (Lai et al., 2016; Kuo et al., 2018) about the site amplification for the existed seismic network have been accumulated. Site effect of our station can be corrected and is needed to be done in our future studies. We have modified and added the text to clarify above statement. See Lines 199-207.

Our result presents a location error of maximum 3.19 km for the ten events. In Taiwan, the branches of Directorate General of Highways(DGH) stand along the three provincial highways around every 30 km. Since the GeoLoc system can locate the rock slope failure and provide the location to the DGH rapidly, the true location of the event will be manually checked within a short time. Thus, the location error in our study is still acceptable for the purpose of issuing warning.

*(3) For ASL the frequency range of 1-8 Hz was used for every event? Were any other ranges tested to reduce error, or a sensitivity analysis conducted? Looking at the spectrograms there are events that have peak frequencies or high amplitude content above 8 Hz.*

Thanks for the comment. We understand that the spatial resolution of the high-frequency seismic signals is better than the low-frequency case. However, the relatively poor quality in observed signals for specific frequency content could significantly contribute the large location errors. Thus, a frequency range of filter was selected to result the high signal-to-noise ratio for all stations. See modified text in Lines 133-138 in the revised manuscript.

*(4) Need to explain how you are estimating the location of events by CC. There is only one line of description in the text. There needs to be more.*

We have rephrased and added text to clarify the CC method. See Lines 153-157.

*(5) Check out Kumagai et al., 2013, they link ASL to event magnitude*

Kumagai et al. (2013) found a linear relationship between the seismic magnitude ( $M_v$ ) and the logarithm of the source amplitude ( $A_0$ ).  $M_v$  can be estimated by the inputs of maximum vertical velocity amplitude ( $v_{max}$ ) and the source-to-station distance ( $r$ ). The ASL determines the source location and  $A_0$  simultaneously. In our study, we built two empirical relations: volume and local magnitude ( $M_L$ ), and seismic amplitude at source ( $A_0$ ) and volume. The volume was estimated by DGH, not from the seismic signal. However, we can further investigate the relationship between  $A_0$  and local magnitude ( $M_L$ ) in the future studies, but it is no necessary for the current study.

*(6) Both horizontal and vertical components are used for the location process, but they are computed individually, why not locate the source using all three components together? This has been shown in Walsh et al. 2019 to decrease location uncertainty.*

For the rock slope failures, the characteristics in signals and frequency contents in horizontal and vertical components can be contributed by the different physical processes. In a case of the rock boulder sliding experiment (Hibert et al., 2017), they found the vertical-component signals corresponds to the impact behavior more than the horizontal-component with substantial amplitude. In our study, we expected that the horizontal-component signals probably associated with the sliding action, based on the spectrograms shown in Figures. S1-S4, you can find the Event S2, S3, S5, S6, M2, M3, and N1, whose



spectrogram of N-S and E-W (horizontal components) is similar, comparing to the vertical component. That's why we compute the root-mean-square (RMS) amplitudes of the filtered horizontal (N-S and E-W) and vertical waveforms and extract the horizontal and vertical envelope functions from the filtered RMS waveforms for location process.

(7) *There needs to be more testing, more "blind tests" for location and type of event. In Figure 6 you show 5 events from different processes. Does your conclusions about the frequency content and how the event behaves hold up over many events? I like that you state that source-receiver distance plays a large role, but I think there is not enough emphasis on this especially when it comes to comparing different types of events (e.g. Fig 6) at specific frequencies between 1 km and almost 9 km away. I don't know if 6e holds up?*

Comprehensive videos are the robust evidence for the physical process of rock slide and rock topple. The typology of IRM, MS and T is summarized by the known physical process of events and was successfully examined by an event on 12th June 2020. The shape of spectrogram links to the physical process like the landslides with cigar/triangular shape (Chen et al., 2013). Many studies supported that this feature of spectrogram shape can be applied elsewhere and so does the typology of IRM, MS and T. Nevertheless, source-receiver distance of different geological background is a key role to affect the transmission of seismic signal. The seismic signal caused by the Antelao Rockslide with volume around  $10^5 \text{ m}^3$  can transmit more than 200 km (Manconi et al., 2016). But the seismic signal generated by Event N1 (the half volume of Antelao Rockslide) cannot be detected when the source-to-station distance is larger than 30 km. The attenuation feature affects the signal decay especially for the high frequency signal and also change the spectrogram features. See Event N1 in Lines 251-255. So, Fig. 6e only work for the source-station distance less than 2.5km. Further, the function of Fig. 6e clarify the physical process for the future application. When detecting the event with location quality A or B and the distance of the best result to the station less than 2.5 km, the spectrogram features are reliable and Fig. 6e can be as additional confirmation.

(8)*I think there needs to be a caveat especially in the conclusion stating that these values and inputs that are used in this manuscript are not universal and only apply to this area of Taiwan at close distances, but the methods used can be applied elsewhere, but calibration needs to be conducted.*

Modified as suggested. See Lines 334-336.

#### **Line comments:**

*Line 25: delete first "directly"*

Removed as suggested. Line 25.

*Line 70: Add citation for lahars (e.g. Kumagai et al., 2009)*

Added as suggested. Line 69.

*Line 71: change "A" to "at"*

Modified as suggested. Line 70.

*Line 71: Change or add "main" or "popular" between "two approaches" there are more than two these are just the most used ones for this purpose.*

Modified as suggested. Line 70.

*Lines 80-82: Where does this come from? You transition from location methods to magnitudes and volumes. Maybe try and rewrite the transition so the reader understands the connection between ASL and volume estimations.*

We have moved this part to the next paragraph. See Lines 86-88.

*Line 131: Why 180 second time windows?*

Based on our experience, the time window length of 180 seconds chose manually is adopted to calculate the signal-to-noise ratio (SNR), which is longer enough to record the entire seismic signals of event. It could be 200, 220 seconds, or larger values. However, the longer time windows possibly cover some onsets of noise signal to mislead the location determination. If you select the different length of time window, the threshold of SNR is needed to adjust.

*Line 146: Two stations? You state this elsewhere as well, two stations seems very low to locate a source with any kind of accuracy. Walsh et al. 2017 showed that ASL needs at least 4-5 stations to obtain a reliable result.*

We totally agree that only two detected stations cannot offer the location result in accuracy by ASL. In practical, Event S1 and S2 in 2015 was recorded only by the stations from the existed seismic stations operated by the Institute of Earth Sciences, Academia Sinica and the Central Weather Bureau is not good enough for detecting rock slope failures (Lines 103-107). Thus, additional stations have deployed by the author team in 2016 and later (Lines 107-112). Then, the number of available stations rose to 4 for Event S4 and S3 in resulting the reliable location. However, there is still lacking and limitation for the existing seismic network. Like the Event S5 is too small for detecting and the Northeast to Southwest in Sinwulyu catchment inherited high location error due to the imperfect station coverage. We further plan to deploy new stations for the hot pot of rock slop failures to improve the accuracy of location.

*Line 150: Need reference for ASL (e.g. Battaglia and Aki, 2003)?*

Many references related ASL is cited in the manuscript already.

*Line 158: What is the velocity you are using for CC?*

A three-dimensional velocity model of Wu et al. (2007) is adopted in this study. See modified text in Line 158.

*Line 159: Why a 50 sec time window, seems long for a location method, especially for a moving source.*

The time window (50 sec) of the envelope function is for CC to compute the cross-correlation function. It had better to cover the whole process of RSFs. Based on spectrograms of events, the duration of signal ranges from 8.8 to 52 seconds except for the Event M1 and the GeoLoc has been created for the automatic determining location for rock slope failures. So, the time windows as 50 seconds has been assigned which is suitable for any kind of RSFs.

*Line 176: Please explain what "N" is defined as better. I had to read several times to understand what "total amount of result location" was.*

We have modified text to clarify it. See Lines 176-179.

*Line 197: Others have shown station geometry for ASL is important as well, please cite them.*

We mentioned the reference of (Walsh et al., 2017) in the revised manuscript. See Line 200.

*Line 265: True, but the signals are also influenced by the dynamics and properties of the RSF as well as the medium in which it moves over.*

Thanks for the comment. In fact, the spectrogram features such as column, triangular and multiple-pulse shapes quite rely on the source physical processes, providing an opportunity to study a simple typology of the RSF events. Even though the frequency content of signals excited by RSF event would be influenced by the propagation distance, medium property and event magnitude, the shape in spectrogram corresponding to different types of RSF still looks similar. Please also see previous response to “Comment (7)” by the Reviewer 2#.

*Line 282: Knowing the location of the source, defies the purpose of a test no? or is this a test on volume and not the whole GeoLoc system?*

We have modified and added text to clarify above statement. See Lines 289-290.

*Line 293: add space between “theIRM”*

Modified as suggestion. See Line 305.

*Line 303-311: What about the automatic location estimate of new events?*

Please see previous response.

*Line 332: delete everything after “activities” and add “around the world”*

Modified as suggestion. See Line 346.

*Figure 2: Capitalize “n” in both instances. In the text it is an “N”*

Modified as suggestion.

*Figure 3: State what the seismic amplitude value is in the text and that these are filtered waveforms.*

Thanks for the question. The waveforms are the raw data. 1-8 Hz of filtering range was identified based on the spectrograms, depicted by the green dash lines shown in Figure 3. We remove the 1-8 Hz from the figure and put it in the figure caption.

*Figure 4: Why are the bottom two events filled differently from all other events? This is not stated in the text, only 1-8 Hz is.*  
*Figure 4: What is the red star? Figure 4: I cannot tell where we are in the location figures, you need to put a DEM or map in the background for the reader to get a sense of where these flows are occurring.*

An example of filtering range of Event S4 has been shown in Line 133-137. Other events inherit the same way to determine their filtering range which shown in Figs. S1-S4 in supplement material. The modified text has been shown in Line 137-138.

The description of red star has been added in the figure.

We would like to keep the original version of Figure 4. The distribution of relative misfit without background is clear to explain the pros and cons of ASL and CC. To solve the unclear location issue, we revised Figure 1, adding the ten locations of rock slope failures to clarify the location.

*Figure 5: Would be nice to have a map or DEM in background for location results*

Modified as suggestion. The DEM has been added as the background in Figure 5.

## References

- Chen C.H., Chao, W.A., Wu, Y.M., Zhao, L., Chen, Y.G., Ho, W.Y., Lin, T.L., Kuo, Y.T., Chang, J.M.: A seismological study of landquakes using a real-time broadband seismic network. *Geophys. J. Int.*, 194(2), 885–898, <https://doi.org/10.1093/gji/ggt121>, 2013.
- Hibert, C., Malet, J.P., Bourrier, F., Provost, F., Berger, F., & Bornemann, P., et al.: Single-block rockfall dynamics inferred from seismic signal analysis. *Earth Surf. Dynam.*, 5, 283–292, <https://doi.org/10.5194/esurf-5-283-2017>, 2017.
- Huang, C.J., Yin, H.Y., Chen, C.Y., Yeh, C.H. and Wang, C.L.: Ground vibrations produced by rock motions and debris flows, *J. Geophys. Res. Earth Surf.*, 112, F02014, <https://doi.org/10.1029/2005JF000437>, 2007.
- Kuo, C.H., Wen, K.L., Lin, C.M., Hsiao, N.C. and Chen, D.Y.: Site amplifications and the effect on local magnitude determination at stations of the surface–downhole network in Taiwan. *Soil. Dyn. Earthq. Eng.*, 104, 106-116, 2018.
- Lai, T.S., Mittal, H., Chao, W.A. and Wu, Y.M.: A Study on Kappa Value in Taiwan Using Borehole and Surface Seismic Array. *B. Seismol. Soc. Am.*, 106(4), 1509-1517, 2016.
- Manconi, A., Picozzi, M., Coviello, V., de Santis, F. and Elia, L.: Real time detection, location, and characterization of rockslides using broadband regional seismic networks. *Geophys. Res. Lett.*, 43, 6960–6967, <https://doi.org/10.1002/2016GL069572>, 2016.
- Walter, F., Burtin, A., McArdell, B. W., Hovius, N., Weder, B. and Turowski, J. M.: Testing seismic amplitude source location for fast debris-flow detection at Illgraben, Switzerland. *Nat. Hazards Earth Syst. Sci.*, 17(6), 939–955, <https://doi.org/10.5194/nhess-17-939-2017>, 2017.

# Locating rock slope failures along highways and understanding their physical processes using seismic signals

Jui-Ming Chang<sup>1</sup>, Wei-An Chao<sup>2,3,4</sup>, Hongey Chen<sup>1,54</sup>, Yu-Ting Kuo<sup>65</sup>, and Che-Ming Yang<sup>76</sup>

<sup>1</sup> Department of Geosciences, National Taiwan University, Taipei 10617, Taiwan.

<sup>2</sup> Department of Civil Engineering, National Chiao Tung University, Hsinchu 30010, Taiwan.

5 <sup>3</sup> Disaster Prevention and Water Environment Research Center, National Chiao Tung University, Hsinchu 30010, Taiwan.

<sup>4</sup> [Department of Civil Engineering, National Yang Ming Chiao Tung University, Hsinchu 30010, Taiwan.](#)

<sup>54</sup> National Science and Technology Center for Disaster Reduction, New Taipei 23143, Taiwan.

<sup>65</sup> Department of the Earth and Environmental Sciences, National Chung-Cheng University, Chia-yi County 621, Taiwan.

<sup>76</sup> Department of Civil and Disaster Prevention Engineering, National United University, Miao-Li 36003, Taiwan.

10 *Correspondence to:* Jui-Ming Chang (d04224006@ntu.edu.tw)

## Abstract.

Regional monitoring of rock slope failures by the seismic technique is rarely studied due to significant source location errors, and it still lacks the signal features needed for understanding events of this type because of the complex mass movement involved. To better understand events of this type, ten known events along highways in Taiwan were analyzed. First, a hybrid approach (GeoLoc) composed of cross-correlation-based and amplitude-attenuation-based approaches was applied, and it produced a location error of maximum 3.19 km for the ten events. Then, we analyzed the ratio of local magnitude ( $M_L$ ) and duration magnitude ( $M_D$ ) and found that a threshold of 0.85 yields successful classification between rock slope failure and earthquake. Further, the GeoLoc can retrieve the seismic parameters, such as signal amplitude at the source ( $A_0$ ) and  $M_L$  of events, which are crucial for constructing scaling law with source volume ( $V$ ). Indeed,  $\text{Log}(V)=1.12M_L+3.08$  and  $V=77,290A_0^{0.44}$  derived in this study provide the lower bound of volume estimation, since the seismic parameters based on peak amplitudes cannot represent the full process of mass loss. Second, while video records correspond with seismic signals, the processes of toppling and sliding present column- and V-shaped spectrograms, respectively. The impacts of rockfall ~~directly~~ link directly to the pulses of seismic signals. Here, all spectrogram features of events can be identified by event volumes larger than 2,000 m<sup>3</sup>, corresponding to the farthest epicenter distance ~2.5 km. The previous results were obtained using the GeoLoc scheme for providing the government rapid reports for reference. Finally, a recent event on 12th June 2020 was used to examine the GeoLoc scheme's feasibility. We estimated the event's volume by the two scalings: 3,838 m<sup>3</sup> and 3,019 m<sup>3</sup>, which was roughly consistent with the volume estimation of 5,142 m<sup>3</sup> from the digital elevation model. The physical processes, including rockfall, toppling, and complex motion behaviors of rock interacting with slope inferred from the spectrogram features were comprehensively supported by the video record and field investigation. We also demonstrated that the GeoLoc scheme, which has been implemented in Sinwulyu catchment, Taiwan,

can provide fast reports, including the location, volume, and physical process of events ~~of this type~~ to the public soon after they occur.

Key Words: rock slope failure, GeoLoc scheme, size estimation, spectrogram features, physical process

## 35 **1. Introduction**

Failures caused by the instability of rock mass are the most common geohazard in mountainous terrain. For this type of mass movement, rock instability can refer to the falling, toppling, slumping, sliding, spreading, creeping, or avalanche of the mass block (Varnes, 1978). A lack of direct observations in the field leads to a challenge in determining the type of mass movement. In general, a rockfall involves physical processes, such as detachment, falling, rolling, bouncing, and fragmentation. It mainly interacts with the substrate, not necessarily with other moving fragments. A rockslide is usually due to instability along a bedding plane or a discontinuous, weakened structure, and often failure with a complex mechanism. A rock topple is forward rotation and overturning of the rock body (Hungr et al., 2013). Here, we use the term 'rock slope failure (RSF)' to represent the aforementioned terms, including rockfall, rockslide, and rock topple along the highways, which can potentially cause damage to humans and the environment.

45 RSFs that occur along the highways may threaten road users and damage the road and facilities. Thus, it is essential to get precise information about the timing, location, and moving volume of such events within a short time for the purpose of issuing warnings and understanding the physical process of failures for assessment of hazard management, field survey, and slope protection after events. Recently, the seismic technique has been widely used for those purposes for RSF events, not only on a local scale (Vilajosana et al., 2008 ; Helmstetter & Garambois, 2010 ; Zimmer et al., 2012 ; Zimmer and Sitar, 2015; Dietze et al., 2017; Roy et al., 2019), but also on a regional scale (Dammeier et al., 2011; Manconi et al., 2016; Fuchs et al., 2018).- In the case of a free-fall event, the leading seismic signals corresponding to crack propagation and rock impact occupy a higher frequency band than do the signals induced by rock detachment and rebound (Levy et al., 2011; Dietze et al., 2017; Roy et al., 2019). A series of field-scale block rockfall experiments were conducted to generate signal templates related to the rolling, bouncing, and impacting of a single block mass, with their respective pulse features shown in the spectrograms. During rock fall, the mass particle might be fragmented, and the individual particles not only interact with the topographic surface but also collide with each other (Hilbert et al., 2017; Saló et al., 2018). Based on a combined analysis of the seismic signals and high-speed video cameras, Saló et al. (2018) found that the impact of large rock boulders on slope can generate lower frequency seismic signals than the impact corresponding to the process with fragmented blocks. Then, for the sliding phase, Manconi et al. (2016) indicated that the spectrograms induced by sliding-controlled behaviour exhibit the traditional triangular shape, which is the same feature as that of landslides (Chen et al., 2013; Hibert et al., 2014) and snow avalanches (Suriñach et al., 2005). Recent studies also concluded that massive, rapid landslides, which include the processes of acceleration and deceleration, could generate strong long-period (10-150 second) seismic signals (Ekström and Stock

2013; Chao et al., 2017). By contrast, the on-site seismic signals of RSFs with frequencies up to 50-100 Hz would be very helpful in exploring the source dynamics. However, most of the studies based on regional seismic networks focused on lower frequencies ranging from 0.1-20 Hz due to the attenuation effect of wave propagation (Deparis et al., 2008; Dammeier et al., 2011; Manconi et al., 2016; Fuchs et al., 2018), resulting in an imperfect understanding of the physical process of RSF.

Some studies have proposed a fully automatic scheme for locating and estimating the size of landslides (Chao et al., 2017), rockslides (Manconi et al., 2016; Fuchs et al., 2018), [lahar \(Kumagai et al., 2009\)](#) and debris flows (Walter et al., 2017) for rapid response purposes. At present, there are two [main](#) approaches to scanning the location of an RSF: the cross-correlation (CC) method and the amplitude source location (ASL) method. CC has been applied to sources with unclear phases in seismic arrivals, but this technique is susceptible to the regional velocity model, station coverage, and signal-to-noise ratio (SNR) of observed signals (Chen et al., 2013; Hibert et al., 2014), which are factors that influence location error. In contrast to CC, ASL does not require a priori knowledge of the velocity structure [with inversion way](#) and can estimate not only the source location but also the seismic parameters, such as the anelastic attenuation of seismic waves ( $\alpha$ ) and seismic amplitude at the source ( $A_0$ ) (Aki and Ferrazzini, 2000; Jones et al., 2013; Rösli et al., 2014; Ogiso and Yomogida, 2015; Walter et al., 2017). However, ASL significantly relies on not only large bursts of seismic amplitude, which are influenced by the site conditions, but also the distribution of epicenter distance between each station and the source. ~~Besides, the event size is a crucial issue for making a rapid report after event occurrence. Recently, a simple scaling between the source magnitude and volume has been well established, covering a wide range of source volumes from  $10^0$  to  $10^6$  m<sup>3</sup>. But, there is a scatter trend in the data distribution for volumes ranging from  $10^2$  to  $10^5$  m<sup>3</sup> (Roy et al., 2019), which is shown in this research.~~

In this study, we develop the GeoLoc scheme which can determine the location of geohazard, classify the source type, estimate the event volume (V), and may offer the information about the physical process of RSF events. Thus, all information yielded by the GeoLoc scheme may make possible rapid reports to the government. The method of location determining also uses the GeoLoc, by combining the CC and ASL techniques with horizontal and vertical seismic signals. In this case, ten RSFs with volumes ranging from 108 m<sup>3</sup> to 164,000 m<sup>3</sup> that occurred along highways (Table S1; see S1 in Supplement) and were documented by the Directorate General of Highways (DGH) in Taiwan are used to explore the feasibility of the GeoLoc. Further, the retrieved seismic parameters,  $A_0$  from ASL and local magnitude ( $M_L$ ) are used with event volume to build regressions for volume estimation. ~~Recently, a simple scaling between the source magnitude and volume has been well established, covering a wide range of source volumes from  $10^0$  to  $10^6$  m<sup>3</sup>. But, there is a scatter trend in the data distribution for volumes ranging from  $10^2$  to  $10^5$  m<sup>3</sup> (Roy et al., 2019), which is shown in this research. Further,~~ ~~With available videos published on public platforms (Table S2), we demonstrated that important physical processes related to seismic signals could be clarified, when the farthest epicentral distance is less than 2.5 km from events of at least 2,000 m<sup>3</sup>. After the successful feasibility test of ten events, a recent RSF event occurred on June 12, 2020, which was used to underscore the implications of the potential use of this rapid reporting system of RSF events that occur on slopes near highways.~~

## 2. Background setting and Seismic data

Taiwan is located at the boundary of the Eurasian Plate, and the Philippine Sea Plate (Fig. 1a), resulting in complex tectonic structures and high seismicity. A combined effect of extreme climate-forced erosion and strong earthquake shaking frequently causes RSF events. Vehicular traffic along three provincial highways, which cross the Taiwan Island from east to west, suffers from the potential threat of [RSFs seismic failures](#), especially at Taroko National park along the east flank of central cross-island highway, which attracts more than four million tourists every year. Thus, a rapid RSF report system is sorely needed for the safety of highway travellers. In practice, after RSFs occur on highways, the materials blocking the road are cleared, and unmanned aerial vehicle (UAV) surveys are routinely performed by DGH. Some events can be captured by video and/or recorded by eyewitnesses. The above information allows us to obtain preliminary data about an RSF, such as the location, occurrence time, volume, and its physical process. Additionally, the Broadband Array in Taiwan for Seismology (BATS) seismic network, maintained by the Institute of Earth Sciences, Academia Sinica (IESAS) (Kao et al., 1998) and the Central Weather Bureau (CWB), is well distributed throughout Taiwan and provides high-quality seismic records for studying RSFs. The present broadband seismic network provides an opportunity to monitor RSFs. However, the primary purpose of this network is to monitor earthquakes. To enhance the station coverage along the highways for the high-risk areas (Crespi et al., 1996; Petley, 1998), temporal seismic arrays have been set up since March 2015 in Liwu catchment (shown as L-NET in Fig. 1b), consisting of one broadband seismometer (Guralp CMG-6TD; Station LW01) and four short-period sensors (KINKEI-KVS300; Stations LW02-LW05) and in Sinwulyu catchment (shown as S-NET in Fig. 1c), with seven broadband seismic stations ([Nanometrics](#) Trillium Compact: CLAB, DLNB, WLUB and XAMB; Guralp CMG-6TD: SW01-SW03). A total of 13 BATS/CWB broadband stations and 12 temporal stations are thus used in this study.

## 3. Flow chart of the GeoLoc scheme

This research has a flow chart showing the specific steps involved in a near-automatic scheme (GeoLoc). The GeoLoc scheme consists of a 4-step automatic procedure: (1) data pre-processing, (2) location process, (3) source classification, and (4) volume estimation (Fig. 2). However, manual time-frequency analysis is necessary for extracting the frequency band of bandpass filtering, the signal duration, and the physical process. The first of the two procedures is addressed in Section 3.1 and Section 3.2, respectively. Once the best location of the source is determined, the classification of the source type is required. We analyzed the ratio of local magnitude and duration magnitude ( $M_L/M_D$ ) for the source classification and established scaling laws of  $V$ ,  $M_L$ , and  $A_0$  to estimate the event volume for the detected RSF event (see Section 4.2). The current GeoLoc scheme does not involve analyzing the physical process in automatic implementation (see Section 4.3). However, the optional time-frequency analysis could provide an event's physical process based on the spectrogram features, such as V-shaped, column-shaped, and pulse-like patterns. The GeoLoc scheme can be operated as a partly automatic monitoring system that delivers rapid reports providing the best source location and volume of the event to



the road users and government for RSF hazard assessment and mitigation. Comprehensive details are given in the following sections.

130

### 3.1 Data pre-processing

Based on the occurrence time and location of RSFs documented by the DGH, the three-component seismic recordings from nearby stations with a 180-second-length window can be cut and then undergo the pre-processing, including removing mean and linear trend. Further, the time-frequency spectrograms are constructed. In the present study, a filtering range is selected that can effectively explain the strong power spectral density (PSD) distributed in the time-frequency map of all stations. A series of spectrogram analyses utilizes the S-transform (Chen et al., 2013). Fig. 3 shows an example of determining the filtering range for Event S4. The spectrogram of station ELDB shows a strong PSD with a wide frequency range of 1-30 Hz. In contrast, the PSD distribution of station SYNB is contained at frequencies below 8 Hz, while the high-frequency signals should decay due to the attenuation of seismic wave propagation. Indeed, cutoff frequencies of 1-8 Hz ~~which fits to all stations recording the Event S4~~ are used in the bandpass filter ~~for Event S4~~. Other events ~~inherit the same way for their filtering range and~~ are shown in Figs. S1-S4. ~~The filtering range from 1 Hz to 8 Hz can be applied to most events, except for the two large-scale events (Events M1 and N1) and one single boulder impaction (Event S5). Thus, the 1-8 Hz frequency range would be adopted in the real-time monitoring and the test of source classification.~~ Then, we compute the root-mean-square (RMS) amplitudes of the filtered horizontal (N-S and E-W) and vertical waveforms and extract the horizontal and vertical envelope functions from the filtered RMS waveforms. Only when envelope functions have an SNR higher than 1.5, and the detected station number is over two, ~~is~~ the GeoLoc location process ~~is~~ considered. The SNR is calculated from the ratio between short-term and whole-term (180 seconds in time length) averages. The short-term average is the average value of a  $\pm 5$ -second time window whose center is the peak envelope amplitude.

### 150 3.2 Location process

In the GeoLoc location process, events are detected by at least two stations with signal-to-noise ratios (SNRs) exceeding 1.5 in the envelope functions. GeoLoc combines the cross-correlation (CC) method (Chen et al., 2013) and the amplitude source location (ASL) method (Walter et al., 2017) using the vertical and horizontal envelope functions for source location determination. The ASL technique not only locates the event but also provides the seismic parameters of the signal amplitude at the source ( $A_0$ ) and signal decay constant ( $\alpha$ ) based on the best fit of the amplitude decay curve ~~by using a least-square scheme~~, which represents the peak-amplitude at  $i$ -th station ( $A_i$ ) decay with increasing source-to-station distance ( $r_i$ ) (Equation (1)). This ASL approach is available only when the epicentral distance is well-distributed for a large number of stations. ~~In the case of a lack of seismic recordings~~ On the other hand, the CC approach, ~~which~~ relies on each station pair's waveform similarity. ~~For each station pair of vertical and horizontal envelope function, the maximum normalized cross-correlation coefficient was calculated and the source location could be found by minimizing the cross-correlation amplitude~~

160

misfit with each searching grid. Details for the CC method can be found in Chen et al. (2013). ~~can provide a possible solution to the estimated event location.~~ However, the CC approach needs a velocity model to compute the theoretical travel-time difference between two stations. In contrast, ASL does not require prior knowledge of the velocity structure. Compared to ASL, the CC method produces only an event location. A three-dimensional velocity model of Wu et al. (2007) is adopted in this study. A  $\pm 25$  second time window is used for the location process, and its center is the peak envelope amplitude (black traces shown in Fig. 4). A grid point on the free surface topography with  $0.01^\circ$  spacing is established for location search. For the ASL method, we assume surface waves are the dominant seismic wave type induced by RSFs (Dietze et al., 2017), so  $n$  value in Equation (1) of 0.5 ( $n = 1$  for body waves and  $n = 0.5$  for surface waves) is used to account for the amplitude attenuation due to geometrical spreading. Thus, there are only two unknown parameters of  $A_0$  and  $\alpha$  in Equation (1).

$$A_i(r) = \frac{A_0}{r_i^n} e^{-\alpha r_i} \quad \text{Equation (1)}$$

The GeoLoc was applied to determine the CC location ( $X_{CC}, Y_{CC}$ ) and ASL location ( $X_{ASL}, Y_{ASL}$ ) simultaneously by minimizing the misfit functions for events ~~recorded by at least two stations.~~ The misfit functions used in the ASL and CC approaches are calculated from discrepancies in the peak envelope amplitude and cross-correlation amplitude, respectively. The relative fitness value is then defined by the normalized misfit functions with ranges from 0 to 1. We then compute the uncertainties ( $\sigma X_{ASL/CC}, \sigma Y_{ASL/CC}$ ) of location results using the standard deviation of longitude and latitude for the source grid points with the relative fitness value higher than 0.95. Then, the location result of the grid point with the highest relative fitness is chosen as the best solution. To understand the relationship between location uncertainty and location error, it is necessary to find the location error between the true location and the resulting source location. We found that the resulting locations with uncertainties ( $\sigma X$  and  $\sigma Y$ ) less than 5 km exhibit the small location error ( $< 3.19$  km). Thus, a threshold of location uncertainty of 5 km is used, and only location results satisfying this threshold are available and discussed later in the next section. For an event, the combination of two methods (CC and ASL) and two envelope functions (horizontal and vertical) can offer 4 location results, so the total amount of available result location ( $N$ ) is 4. We characterize the quality of a solution for the RSF event based on the  $N$ -value. The quality level labels are A:  $3 \leq N$ ; B:  $1 \leq N < 3$  and C:  $N = 0$ . The best-result source location is determined by the minimum uncertainties from  $N$  of available result location. In Event S4, the three results' location satisfies the uncertainty threshold (red frame, Fig. 4), so the location quality is A. Then, the best-result source location is produced by the ASL with a vertical envelope. For the Event N1,  $N$  is two equals 2 belonging to the quality level B. The best location is the output by the CC with a horizontal envelope.

## 190 4. Results and Discussion

### 4.1 Location

After analysing ten RSFs along highways, the events with quality levels A (Events S4 and M3) and B (Events S1, S3, S6, and N1) that occurred during the non-typhoon period were determined with location errors between 0.97 and 3.19 km (Fig. 5a). The volume of those events is more massive than 2,000 m<sup>3</sup> (Table S1). Small event size and high background noise level, which result in poor waveform quality causing the location quality level C, are two significant factors contributing to location error. For example, the two smallest events with a volume of 108 m<sup>3</sup> (Event S5) and 400 m<sup>3</sup> (Event M2) exhibit a high location error of 3.76 and 44.14 km, respectively. Even though Event M1 is the largest event, it can lead to a large location error of 23.61 km because of the high background noise level during the typhoon period with low SNR value at each station (Table S1).

A hybrid GeoLoc-~~scheme~~ provides a functional event location for the different station coverage conditions and the distribution of epicentral distances. In general, the CC method mainly relies on station coverage. Thus, Event S4 shows that location uncertainty has a clear trend along the station gap, existing in the northeast-to-southwest direction. However, there is a relative lack of influence on the result derived from the ASL method (Fig. 4). On the contrary, Event N1, with proper station coverage, still leads to a high location uncertainty in the ASL case which underscores that a well-distributed epicentral distance is a crucial factor for the ASL method. Previous study also demonstrated that the site amplification could strongly influence the location result (Walsh et al., 2017). At local-scale area, site amplification factors for the specific station can be estimated easily by the ratios of coda amplitudes relative to a reference station (Kumagai et al., 2009). However, the aim of this study is to propose a rapid system to provide information about the timing, location, and moving volume of such events within a short time to highway authority. For the seismic stations along highways, it is difficult to select a reference station, which will be a challenge to comprehensively investigate the site amplification based on the method adopted in Kumagai et al. (2009). In Taiwan, recent studies (Lai et al., 2016; Kuo et al., 2018) about the site amplification for the existed seismic network have been accumulated. Site effect of our station can be corrected and is needed to be done in our future studies.

## 215 4.2 Source discrimination and volume estimation

For rapid RSF hazard assessment along roads, successful source classification and event size estimation are needed. Manconi et al. (2016) proposed that the ratio between the local magnitude ( $M_L$ ) and the duration magnitude ( $M_D$ ) ( $M_L/M_D=0.8$ ) could effectively distinguish rockslide event from earthquake sources. To further examine the threshold of  $M_L/M_D$  in our case, we selected ten local earthquakes from the CWB catalogue (Table S3) and collected seismic records of earthquakes from BATS and S-NET stations. We applied the same analysis procedures as in the RSF event, and all earthquakes analyses resulted in location quality levels of A or B. For both earthquakes and RSFs, the magnitude scales of  $M_L$  and  $M_D$  for the best location are computed, and then the ratio of  $M_L/M_D$  is derived (see S3 in Supplement). In the case of the earthquakes, the average  $M_L/M_D$  ratio is 0.98, with a minimum value of 0.86. For the RSFs,  $M_L/M_D$  ratios are on average 0.24 and never exceed 0.82. Thus, the threshold of  $M_L/M_D$  of 0.85 is used to distinguish RSFs and earthquakes (Fig. 5b). We

225 also found that the relationship between  $M_L$  and  $M_D$  in local earthquakes is consistent with the regression line derived in Shin et al. (1993) (see S3 in Supplement; Fig. S5).

To mitigate the hazards caused by RSFs, rapid determination of source volume is essential for making emergency responses. We first build an empirical relation of  $\text{Log}(V)=1.12M_L+3.08$  as shown in Fig. 5c. The ASL method in the GeoLoc location process can provide the seismic amplitude at the event source ( $A_0$ ), which is an additional parameter in estimating event size. Before exploring the relationship between  $V$  and  $A_0$ , a test was conducted to investigate the influence of location uncertainty on the  $A_0$  value. After making the amplitude correction of  $A_0$  for the specific events (see S4 Supplement), we further established a simple power scaling of  $V=77,290A_0^{0.44}$  with a linear correlation coefficient ( $R$ ) of 0.68 (Fig. 5c) and  $A_0$  ranging from  $1.60\times 10^{-5}$  to  $6.61\times 10^{-2}$  cm/s (Table S1). However, the volume estimate from the two scalings could be underestimated because both  $M_L$  and  $A_0$  were derived based on the peak amplitude. We expected that  $M_L$  and  $A_0$  were sensitive to the moment of the highest energy release, such as the most significant boulder impact from a sequence of rockfall or the rock mass impact on the slope/road from the toppling event, which cannot represent the entire process. Thus, the estimation from  $M_L$ - $V$  and  $A_0$ - $V$  offer the lower bound for total volume loss.

Another parameter  $\alpha$  is linked to the seismic energy lost due to attenuation along with wave propagation. We collected the  $\alpha$  values from three events (Table S4), where their ASL results yielded the location uncertainty threshold. The result indicates that the attenuation is more rapid in the Sinwulyu catchment than Liwu catchment due to the geological background (see S4 in Supplement).

### 4.3 Physical process

Most of the RSFs were recorded by cameras and/or documented by news reports (Table S2), which provided an advanced understanding of the relation between the physical processes and the associated seismic signals. Based on events with a comprehensive video of the above observations, we can classify physical processes due to their different behaviors: (i) fast and large mass sliding, (ii) complex interactions between the rock mass and propagation surface, and (iii) intact rock detached from the cliff. For Event S4, a video camera captured the phases corresponding to the falling, bouncing, fragmenting, and impacting of multiple rock boulders during the initial stage. Approximately 19 seconds later, debris rapidly slide downward and deposited on the slope and road. At the termination stage, a few boulders fell. Before the comparison between the seismic signals and video, we collect the spectrogram from the closest station (ELDB; epicentral distance is 1.26 km) for Event S4 and find the time point (19 seconds in the video shown at the top of Fig. 6a to UTC 7:03:31) associated with the strongest PSD values. We assume that rapid debris mass sliding contributes to stronger PSD amplitudes. During initiation and termination, a relatively weak PSD amplitude is observed at frequencies lower than 2 Hz. Similarly, in the beginning, the video of Event N1 shows a rock mass sliding down from the scarp continuously, which can redistribute stress acting on the sliding surface. Finally, the large mass moves rapidly downward. Again, we align the timing (24 seconds in the video to UTC 01:08:39) of the peak PSD value with the large mass movement inferred from the video. The closest station,

YHNB, is 8.7 km from Event N1. Indeed, high-frequency signals decay rapidly with increasing propagation distance, resulting in seismic energy with a frequency content below 10 Hz and a short signal duration of 15 seconds. We also found that SW02 for Event S4 with an epicentral distance of 7.70 km exhibits a similar spectrogram pattern (Fig. 3) to YHNB (Fig. 260 S4). We can demonstrate that the signals from stations at greater epicentral distances cannot capture the event's full process, leading to discrepancies between the event durations detected by the video and the seismic records. In the case of a small-sized event (Event S6), there is no visible lower-frequency signal ( $< 2$  Hz) observed at the nearest station, SW02 (Fig. 6d). Thus, only large mass sliding (MS) can cause a relatively low frequency of 1-3 Hz (MS shown in Figs. 6a and 6b), which coincides with the findings of a recent landslide study (Zhang et al., 2020). The interaction of the rock mass (IRM) acting on the slope favors the generation of higher frequencies ( $> 3$  Hz; Deparis et al., 2008; Zimmer et al., 2012; IRM as shown in 265 Figs. 6a, 6b, and 6d). Temporal changes in mass removal related to the aforementioned physical processes usually exhibit the V-shaped spectrogram (Figs. 6a and 6d) observed by the nearby stations.

For Event S2, we align the timing (57 seconds in the video to UTC 08:43:27) of the peak PSD value with the impact inferred from the video. The video shows apparent crack nucleation before the toppling. In the beginning, the leading 270 seismic phase of 2 Hz is associated with the intact rock being detached from the cliff (white box shown in Fig. 6f), which may correlate to the seismic response from the hillslope. This leading phase could easily be detected in the slope-scale monitoring of rockfall (Roy et al., 2019). The total duration associated with the detachment to deposition of approximately 16 seconds is consistent with the signal duration identified from the spectrogram of station ELDB (50 to 66 seconds in the video shown in Fig. 6f). Notably, compared to the [spectrogram](#) for the sliding-dominant behavior, that for the 275 toppling process exhibits a column shape (T phase shown in 3f), showing a wide range of frequencies. Similarly, Event M3, which corresponds to the detachment and impact mechanism (e.g., an overhanging rockfall whose impactation behavior is similar to toppling), also creates column-shaped spectrograms (Fig. 6c). For the two smallest RSFs (Events S5 and M2) without video, we also conducted a combined analysis based on spectrograms and field photos, and we found that the pulse-like spectrogram features can be linked to the impacts of small-to-large sized boulder masses (see S5 in Supplement)

280 In summary, seismic signals can provide an additional constraint on source physical processes, but they are influenced by the magnitude of the source and the source-to-station distance, which controls the radiation and attenuation of seismic waves. Rapid, massive sliding events with volumes above  $5,000 \text{ m}^3$  show a specific seismic phase of MS. Furthermore, the complex interaction of a sliding rock mass exhibits relatively high-frequency signals, which is termed the IRM phase. The transition zone between IRM and MS is approximately 2-3 Hz. IRM can be over 20 seconds on the volume 285 scale of larger than  $2,000 \text{ m}^3$ , corresponding to the farthest epicenter distance of  $\sim 2.58$  km. Moreover, V-shaped spectrograms are induced by the combination of IRM and MS phases, which could be detected only by the closer stations. For an event acting with the toppling process and/or impact-dominant mechanism, the giant boulder mass directly impacts the ground and exhibits column-shaped spectrograms, which are up to 30 Hz (T phase). Our simple typology of physical processes based on seismic features in signal duration and frequency content recorded by the closer station (epicenter 290 distance less than 2.5 km) is summarized in Fig. 6e. Indeed, our typology is unavailable when the distance is larger than 2.5

km. For example, the V-shaped spectrogram feature cannot be captured by the Station YHNB for the Event N1 with MS behavior.

#### 4.4 GeoLoc scheme applied for rapid report

295 To test how the GeoLoc scheme, which composes of source classification, volume estimation and extraction of physical process, can provide a rapid report, an event that occurred at 01:09 on 12th June 2020 (UTC) was used. This event was only recorded by the BATS seismic station of TDCB (the epicentral distance of ~600 m). Thus, the location process of the GeoLoc scheme cannot be examined. However, the seismic signals of a closer station would help evaluate the feasibility of making source classification and volume estimation and understanding the event's physical process. With a  
300 priori knowledge of source location, we directly compute the seismic magnitude. The result shows the  $M_L$  and  $M_D$  of 0.36 and 2.75, respectively. A  $M_L/M_D$  of 0.13 can yield successful source identification using the threshold of 0.85 proposed in this study. Furthermore, we utilize the peak amplitude of  $1.09 \times 10^{-3}$  cm/s recorded by Station TDCB to be  $A_0$ -value for the volume estimation. Application of two regression scaling relations derived in this study (Fig. 5c and 5d) yield the source volumes ( $V$ ) of 3,838 m<sup>3</sup> and 3,019 m<sup>3</sup>, respectively, roughly consistent with the preliminary volume of 5,142 m<sup>3</sup> estimated  
305 from the digital surface model (Fig. 7a).

Three-component spectrograms from the Station TDCB are shown in Fig. 7b. Based on our simple typology of the physical process, the spectrogram of the TDCB was used, and its physical process can be divided into three parts: (i) the pulse-like features can be observed during the period from 01:09:25 to 01:09:38 (green rectangle in Fig. 7b), corresponding to multiple rockfalls. (ii) the emergent column-shape spectrogram (01:09:38 to 01:09:45 in Fig. 7b) relates to the rock  
310 toppling process with mass impacting and/or impact of the boulder rock mass. Finally, the process turned to the complex interactions between the fragmented rock mass and propagation surface with the PSD dominating over 2 Hz of the IRM phase.

To examine the aforementioned physical processes, we obtain the video released by the DGH. At the beginning of the video, the motion type of the rock mass includes rolling, bouncing, and impacting the hillslope and road surface in the  
315 first 15 seconds of the video. Then, the massive rock mass topples (18 seconds, Fig. 7c) and hits the slope (19 seconds), and finally raises a cloud of dust (after 19 seconds). After aligning the time point (19 seconds in the video to UTC 01:09:42) of the peak PSD value with the significant impact inferred from the video, the above spectrogram features are consistent with the motion behaviors extracted from the video, except for the IRM phase. Based on the photos captured by the drones (Fig. 7a), the run-out distance is around 200 m, which implies the mass material continued to move rather than just stop, so it  
320 generated a continuous signal of 50 seconds.

Notably, the real-time broadband waveforms from 5 stations (CLAB, XAMB, WLUB, ELDB, SYNBN shown in Fig. 1) distributed along the southern provincial highway and one station (YULB) outside the Sinwulu catchment, are ready for

real-time implementation. Based on the flowchart of the GeoLoc scheme shown in Fig. 2, we first fixed a bandpass filtering of 1-8 Hz, which can be applied to most events in this catchment, except for one single boulder impaction (Event S5).  
325 Certain thresholds of  $M_L/M_D$  (0.85) and propagation distance (10 km; see Fig. S8) are used to ensure successful source discrimination. Two scaling lines established in this study are available for rapid volume estimation. However, manual checks are still needed to obtain the signal duration (required in calculating  $M_D$ ) and physical process, which can easily be automatized by machine-learning-based classification approaches. Since June 2020, the GeoLoc-based monitoring system has been in operation online and is under testing.

330

## 5. Conclusions

The GeoLoc scheme has been developed to successfully study ten RSFs by using the seismic signals from permanent and temporary seismic networks, providing estimations of the location and associated seismic parameters, namely,  $A_0$ ,  $\alpha$ ,  $M_L$  and  $M_D$ . For the source discrimination, a certain threshold of the  $M_L/M_D$  of 0.85 can essentially classify  
335 the sources of RSFs and earthquakes [in Taiwan](#). We further built two regression equations for the  $V-A_0$  and  $V-M_L$  relations, which are crucial for estimating the lower bound of source volume after an event occurrence. By analysing the videos and seismic signals from the nearest station with epicenter distance of less than 2.5 km, we can comprehensively understand the main physical processes that control the seismic signals' features. For example, the characteristics in spectrograms induced by the multiple rockfalls, the impaction of boulder mass (similar to toppling), and the complex interactions between the rock  
340 mass and propagation surface exhibit pulse-like, column-shaped, and V-shaped features, respectively. [The aforementioned threshold and limitation are applicable to monitor the RSFs in Taiwan; however, for the area with different geological background, those value should be varied.](#)

In practice, for the events with location quality levels A and B, we can provide information on the source location, volume estimate, and physical process within a short time. For the events with quality level C, only the physical process  
345 from the spectrogram features can be retrieved. The result of this research is vital for the government to make effective emergency responses after an RSF occurrence. Rapid estimation of location and volume would be helpful for effective road control and hazard management. The physical process also delivers a useful message to engineering geologists for better understanding the failure mechanisms of RSFs and for designing slope protection plans. Before implementing the GeoLoc scheme in real-time, a detailed geological survey is necessary for better understanding potential failure mechanisms and  
350 highlighting high-risk slopes. Currently, the GeoLoc scheme shown in Fig. 2 has already been adopted in the Sinwulyu catchment, which is a high-risk area of RSFs in Taiwan, and it could be readily applied in other places with high RSF activities [around the world, such as the Alps in Europe, the Southern Alps in New Zealand, Yosemite National Park in America, etc. as well.](#)

355 **Conflict of Interest**



The authors declare that they have no conflict of interest.

### Dataset Availability

360 Waveform data for this study are provided by the Broadband Array for Seismology in Taiwan (BATS, doi:10.7914/SN/TW) and Central Weather Bureau (CWB), Taiwan. The raw seismic data of the temporal network used in this study are available through Figshare at this site: <https://doi.org/10.6084/m9.figshare.12203258> and the video record of the event on 12<sup>th</sup> June 2020 at <https://doi.org/10.6084/m9.figshare.13168427.v1>. The Digital Elevation Model (DEM) of Taiwan is from Government Open Data Platform, Taiwan at the site: <https://data.gov.tw/dataset/35430>.

### 365 Author contribution

JM performed the seismic data analysis and location inversion. WA developed the hybrid method (GeoLoc) and assisted in implementing the location inversion. JM and WA deployed and maintained the seismic array. H helped to co-ordinate the deployment of seismic array. YT and CM conducted a series of the field works for RSF events. All authors contributed to the dataset compilation, interpretation and the writing of this paper.

370

### Acknowledgments, Samples, and Data

This research was supported by the Ministry of Science and Technology (MOST) grant MOST 108-2636-M-009-005 (the Young Scholar Fellowship Einstein Program), and partly financially supported from the Central Geological Survey (CGS), MOEA, grant Project number: B10923, the Soil and Water Conservation Bureau grant SWCB-109-11-1-01-0001(21) and the 375 Academia Sinica grant AS-TP-108-M08 and the Higher Education Sprout Project of the National Chiao Tung University and Ministry of Education (MOE), Taiwan. The authors acknowledge the Sinotech Disaster Prevention Technology Research Center to provide the data of failure volume of the Event N1, Directorate General of Highways (DGH), Taiwan for the Rockfall inventory, field photo and, video and, CWB for the earthquake inventory.

### References

- 380 Aki, K. and Ferrazzini, V.: Seismic monitoring and modeling of an active volcano for prediction. *J. Geophys. Res.*, 105, 16617–16640. <https://doi.org/10.1029/2000JB900033>, 2000.
- Chao, W.A., Wu, Y.M., Zhao, L., Chen, H., Chen, Y.G., Chang, J.M. and Lin, C.M.: A first near real-time seismology based landquake monitoring system. *Sci. Rep.*, 7:43510. <https://doi.org/10.1038/srep43510>, 2017.
- Chen C.H., Chao, W.A., Wu, Y.M., Zhao, L., Chen, Y.G., Ho, W.Y., Lin, T.L., Kuo, Y.T., Chang, J.M.: A seismological 385 study of landquakes using a real-time broadband seismic network. *Geophys. J. Int.*, 194(2), 885–898, <https://doi.org/10.1093/gji/ggt121>, 2013.
- Crespi, J.M., Chan, Y.C. and Swaim, M.S.: Synorogenic extension and exhumation of the Taiwan hinterland, *Geology*, 24, 247–250, [https://doi.org/10.1130/0091-7613\(1996\)024%3C0247:SEAEOT%3E2.3.CO;2](https://doi.org/10.1130/0091-7613(1996)024%3C0247:SEAEOT%3E2.3.CO;2), 1996.
- Dammeier, F., Moore, J.R., Haslinger, F. and Loew, S.: Characterization of alpine rockslides using statistical analysis of 390 seismic signals. *J. Geophys. Res. Earth Surf.*, 116, F04024, <https://doi.org/10.1029/2011JF002037>, 2011.
- Deparis, J., Jongmans, D., Cotton, F., Baillet, L., Thouvenot, F., & Hantz, D.: Analysis of rock-fall and rock-fall avalanche seismograms in the French Alps. *Bull. Seismol. Soc. Am.*, 98, 1781–1796, <https://doi.org/10.1785/0120070082>, 2008.



- Dietze, M., Turowski, J.M., Cook, K.L. and Hovius, N.: Spatiotemporal patterns, triggers and anatomies of seismically detected rockfalls. *Earth Surf. Dynam.*, 5, 757–779, <https://doi.org/10.5194/esurf-5-757-2017>, 2017
- 395 Ekström G. and Stark, C.P.: Simple scaling of catastrophic landslide dynamics. *Science*, 339(6126):1416–1419, <https://doi.org/10.1126/science.1232887>, 2013.
- Fuchs, F., Lenhardt, W., Bokelmann, G. and the Alp Array Working Group.: Seismic detection of rockslides at regional scale: Examples from the Eastern Alps and feasibility of kurtosis-based event location. *Earth Surf. Dynam.*, 6, 955–970, <https://doi.org/10.5194/esurf-6-955-2018>, 2018.
- 400 Helmstetter, A. and Garambois, S.: Seismic monitoring of Séchilienne rockslide (French Alps): Analysis of seismic signals and their correlation with rainfalls. *J. Geophys. Res. Earth Surf.*, 115, F03016, <https://doi.org/10.1029/2009JF001532>, 2010.
- Hibert, C., Mangeney, A., Grandjean, G., Baillard, C., Rivet, D., Shapiro, N.M., Satriano, C., Maggi, A., Boissier, P., Ferrazzini, V., Crawford, W.: Automated identification, location, and volume estimation of rockfalls at Piton de la Fournaise volcano. *J. Geophys. Res. Earth Surf.*, 119, 1082–1105, <https://doi.org/10.1002/2013JF002970>, 2014.
- 405 Hibert, C., Malet, J.P., Bourrier, F., Provost, F., Berger, F., & Bornemann, P., et al.: Single-block rockfall dynamics inferred from seismic signal analysis. *Earth Surf. Dynam.*, 5, 283–292, <https://doi.org/10.5194/esurf-5-283-2017>, 2017.
- Hungr, O., Leroueil, S. and Picarelli, L.: The Varnes classification of landslide types, an update. *Landslides*, 11 (2), 167–194, <https://doi.org/10.1007/s10346-013-0436-y>, 2013.
- 410 Jones, G.A., Kulesa, B., Doyle, S.H., Dow, C.F. and Hubbard, A.: An automated approach to the location of icequakes using seismic waveform amplitudes. *Ann. Glaciol.*, 54, 1–9, <https://doi.org/10.3189/2013AoG64A074>, 2013.
- Kao, H., Jian, P.R., Ma, K.F., Huang, B.S. and Liu, C.C.: Moment-tensor inversion for offshore earthquakes east of Taiwan and their implications to regional collision. *Geophysical Research Letter*, 25, 3619–3622, <https://doi.org/10.1029/98GL02803>, 1998.
- 415 [Kumagai, H., Palacios, P., Maeda, T., Barba Castillo, D. and Nakano, M.: Seismic tracking of lahars using tremor signals, \*J. Volcanol. Geotherm. Res.\*, 183, 112–121, <https://doi.org/10.1016/j.jvolgeores.2009.03.010>, 2009.](#)
- [Kuo, C.H., Wen, K.L., Lin, C.M., Hsiao, N.C. and Chen, D.Y.: Site amplifications and the effect on local magnitude determination at stations of the surface–downhole network in Taiwan. \*Soil. Dyn. Earthq. Eng.\*, 104, 106–116, 2018.](#)
- 420 [Lai, T.S., Mittal, H., Chao, W.A. and Wu, Y.M.: A Study on Kappa Value in Taiwan Using Borehole and Surface Seismic Array. \*B. Seismol. Soc. Am.\*, 106\(4\), 1509–1517, 2016.](#)
- Levy, C., Jongmans, D. and Baillet, L.: Analysis of seismic signals recorded on a prone-to-fall rock column (Vercors massif, French Alps). *Geophysical Journal International*, 186, 296–310, <https://doi.org/10.1111/j.1365-246X.2011.05046.x>, 2011.
- Manconi, A., Picozzi, M., Coviello, V., de Santis, F. and Elia, L.: Real time detection, location, and characterization of rockslides using broadband regional seismic networks. *Geophys. Res. Lett.*, 43, 6960–6967,

<https://doi.org/10.1002/2016GL069572>, 2016.

- Ogiso, M. and Yomogida, K.: Estimation of locations and migration of debris flows on Izu-Oshima Island, Japan, on 16 October 2013 by the distribution of high frequency seismic amplitudes. *J. Volcanol. Geotherm. Res.*, 15–26, <https://doi.org/10.1016/j.jvolgeores.2015.03.015>, 2015.
- 430 Petley, D.: Geomorphological mapping for hazard assessment in a neotectonic terrain. *Geogr. J.*, 164, 183–201, <https://doi.org/10.2307/3060369>, 1998.
- Röösli, C., Walter, F., Husen, S., Andrews, L. C., Lüthi, M. P., Catania, G. A. and Kissling, E.: Sustained seismic tremors and ice- quakes detected in the ablation zone of the Greenland ice sheet. *J. Glaciol.*, 60, 563–575, <https://doi.org/10.3189/2014JoG13J210>, 2014.
- 435 Roy, G.Le., Helmstetter, A., Amitrano, D., Guyoton, F. and Roux-Mallouf, R.Le.: Seismic analysis of the detachment and impact phases of a rockfall and application for estimating rockfall volume and free-fall height. *J. Geophys. Res. Earth Surf.*, 124, 2602-2622, <https://doi.org/10.1029/2019JF004999>, 2019.
- Saló, L., Corominas, J., Lantada, N., Matas, G., Prades, A., & Ruiz-Carulla, R.: Seismic energy analysis as generated by impact and fragmentation of single-block experimental rockfalls. *J. Geophys. Res. Earth Surf.*, 123(1450), 78, <https://doi.org/10.1029/2017jf004374>, 2018.
- 440 Shin, T.C.: The Calculation of Local Magnitude from the simulated Wood-Anderson Seismograms of the Short-Period Seismograms in the Taiwan Area. *Terr. Atmospheric Ocean. Sci.*, 4, 155-170, [https://doi.org/10.3319/TAO.1993.4.2.155\(T\)](https://doi.org/10.3319/TAO.1993.4.2.155(T)), 1993.
- Suriñach, E., Vilajosana, I., Khazaradze, G., Biescas, B., Furdada, G. and Vilaplana, J.M.: Seismic detection and 445 characterization of landslides and other mass movements. *Nat. Hazards Earth Syst. Sci.*, 5(6), 791–798, <https://doi.org/10.5194/nhess-5-791-2005>, 2005.
- Varnes, D. J.: Slope movements: Types and processes, in *Landslide Analysis and Control*, edited by R. L. Schuster and R. J. Krizek, Spec. Rep. 176, pp. 11 – 33, Transp. Res. Board, Natl. Acad. Sci., Washington, D. C., 1998.
- Vilajosana, I., Suriñach, E., Abellán, A., Khazaradze, G., Garcia, D. and Llosa, J.: Rockfall induced seismic signals: Case 450 study in Montserrat, Catalonia. *Nat. Hazards Earth Syst. Sci.*, 8, 805–812. <https://doi.org/10.5194/nhess-8-805-2008>, 2008.
- [Walsh, B., Jolly, A.D., and Procter, J.: Calibrating the amplitude source location \(ASL\) method by using active seismic sources: An example from Te Maari volcano, Tongariro National Park, New Zealand. \*Geophys. Res. Lett.\*, 44, 3591-3599. <https://doi.org/10.1002/2017GL073000>, 2017.](https://doi.org/10.1002/2017GL073000)
- 455 Walter, F., Burtin, A., McArdeall, B. W., Hovius, N., Weder, B. and Turowski, J. M.: Testing seismic amplitude source location for fast debris-flow detection at Illgraben, Switzerland. *Nat. Hazards Earth Syst. Sci.*, 17(6), 939–955, <https://doi.org/10.5194/nhess-17-939-2017>, 2017.
- Wu, Y.M., Chang, C.H., Zhao, L., Shyu, J.B.H., Chen, Y.G., Sieh, K. and Avouac, J.P.: Seismic tomography of Taiwan:

- improved constraints from a dense network of strong-motion stations. *J. Geophys. Res.-Sol. Ea.*, 112, B08312,  
460 <https://doi.org/10.1029/2007JB004983>, 2007.
- Zhang, Z., He, Z. and Li, Q.: Analyzing high-frequency seismic signals generated during a landslide using source  
discrepancies between two landslides. *Eng. Geol.*, 272, 105640, <https://doi.org/10.1016/j.enggeo.2020.105640>, 2020.
- Zimmer, V.L., Collins, B.D., Stock, G.M. and Sitar, N.: Rock fall dynamics and deposition: An integrated analysis of the  
2009 Ahwiyah Point rock fall, Yosemite National Park, USA. *Earth Surf. Process.*, 37(6), 680–691,  
465 <https://doi.org/10.1002/esp.3206>, 2012.
- Zimmer, V.L. and Sitar, N.: Detection and location of rock falls using seismic and infrasound sensors. *Eng. Geol.*, 193, 49–  
60, <https://doi.org/10.1016/j.enggeo.2015.04.007>, 2015.

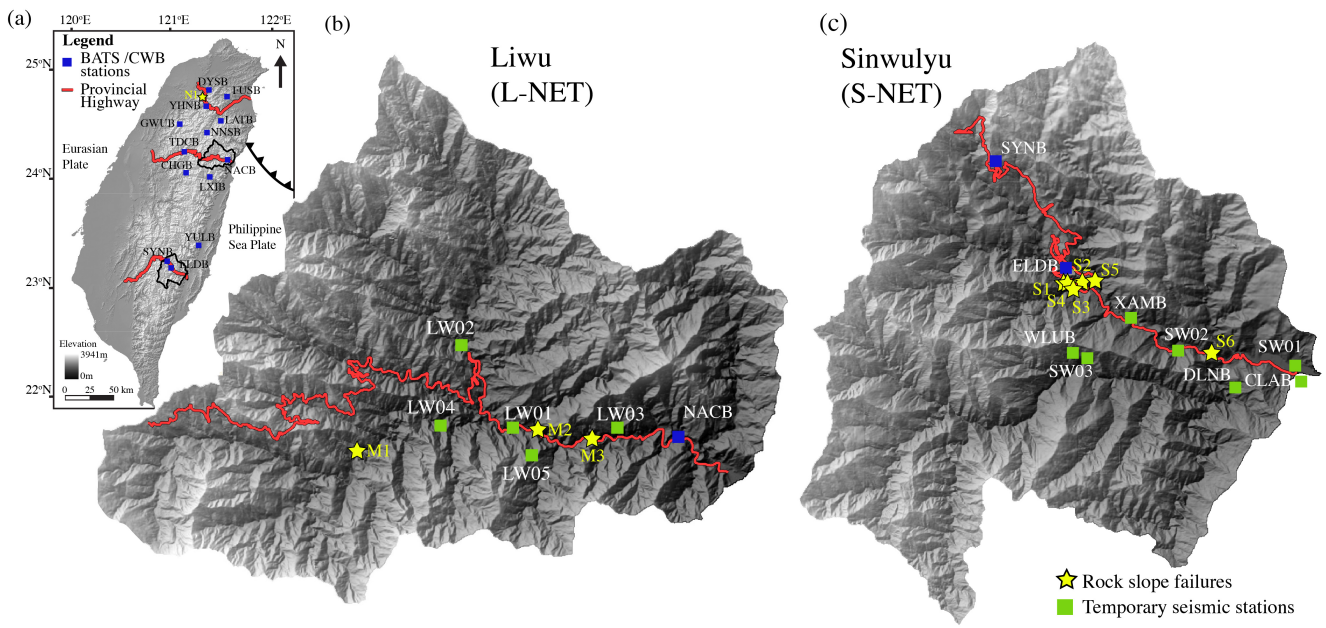

470

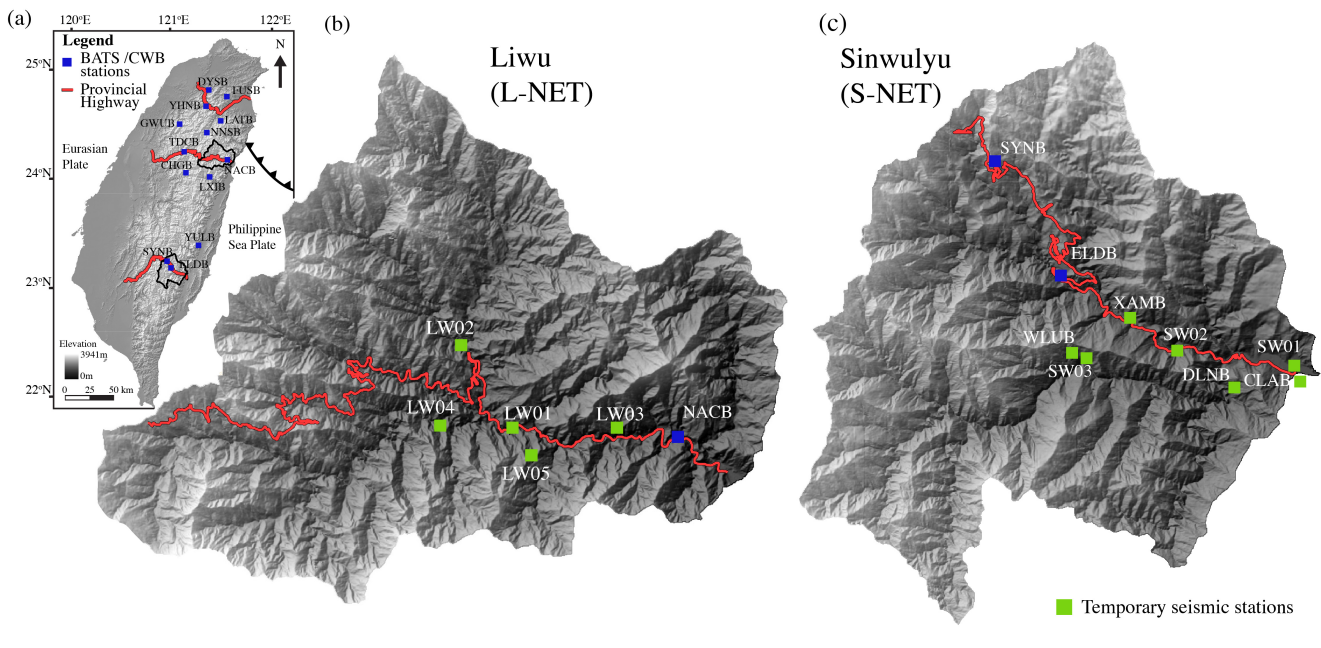

**Figure 1.** Research area and distribution of seismic stations and ten rock slope failures (RSFs, yellow star). (a) Topographic map of Taiwan shows three provincial highways (red lines) and BATS/CWB stations (blue square). (b) Liwu catchment, the east flank of the central provincial highway, and the temporary seismic network (L-NET, green square). (c) Sinwulyu catchment, the east flank of the southern provincial highway, and the temporary seismic network (S-NET, green square). The data of Digital Elevation Model (DEM) of Taiwan and two catchments are from Government Open Data Platform, Taiwan.

# GeoLoc Scheme

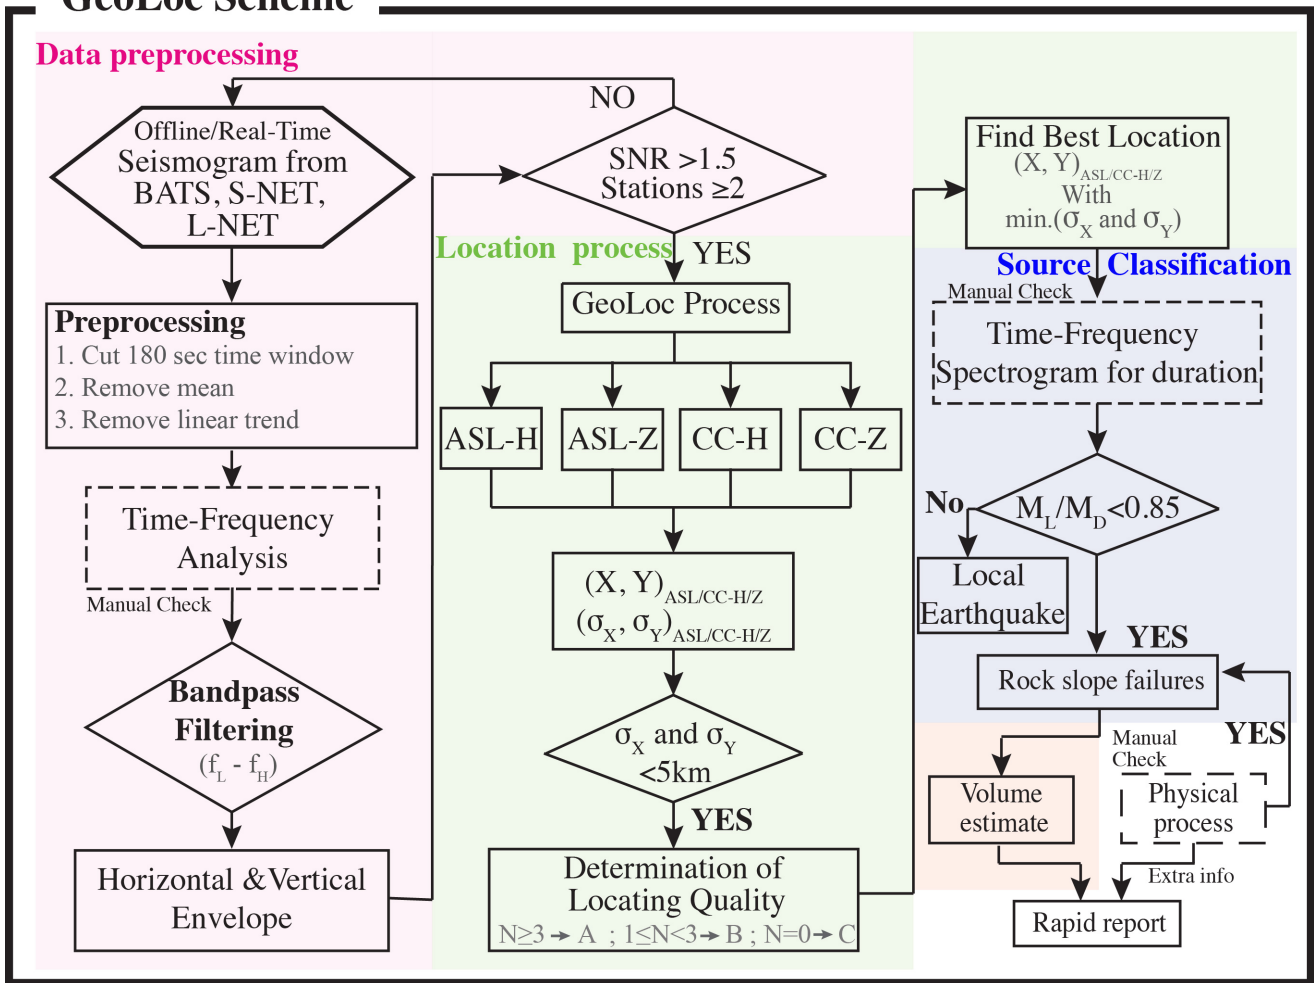

# GeoLoc Scheme

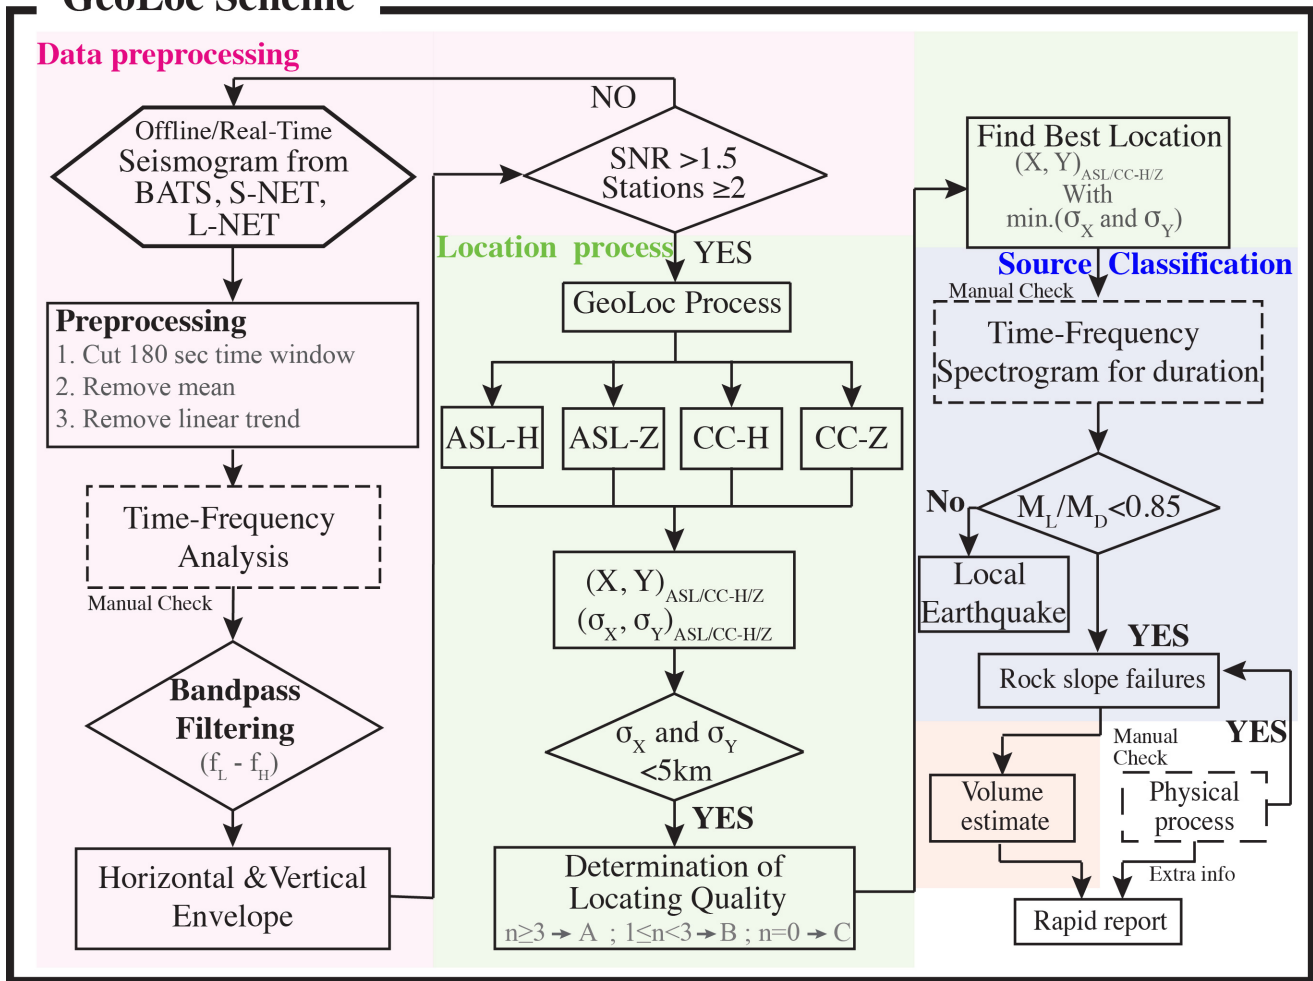

**Figure 2.** Flowchart of the GeoLoc scheme, including data preprocessing, location process, source classification, and volume estimate. All steps are automatic, except the steps with rectangular dashes which involved manual check in this research.  $f_L$  and  $f_H$  are the lower and upper band of the bandpass filtering.  $(X, Y)_{ASL/CC-H/Z}$  is the best location form the ASL or CC with horizontal or vertical components.  $(\sigma_X, \sigma_Y)_{ASL/CC-H/Z}$  are those location uncertainties based on the relative fitness over 0.95.  $N_{\#}$  is the number of methods with components (total:  $N_{\#}=4$ ) whose location error less than 5 km threshold. The result with minimum location error defines the best location.

485



S4 4th October 2016 07:03:10 (UTC)

Location: 121.028°E 23.176°N Volume: 21,000 m<sup>3</sup>

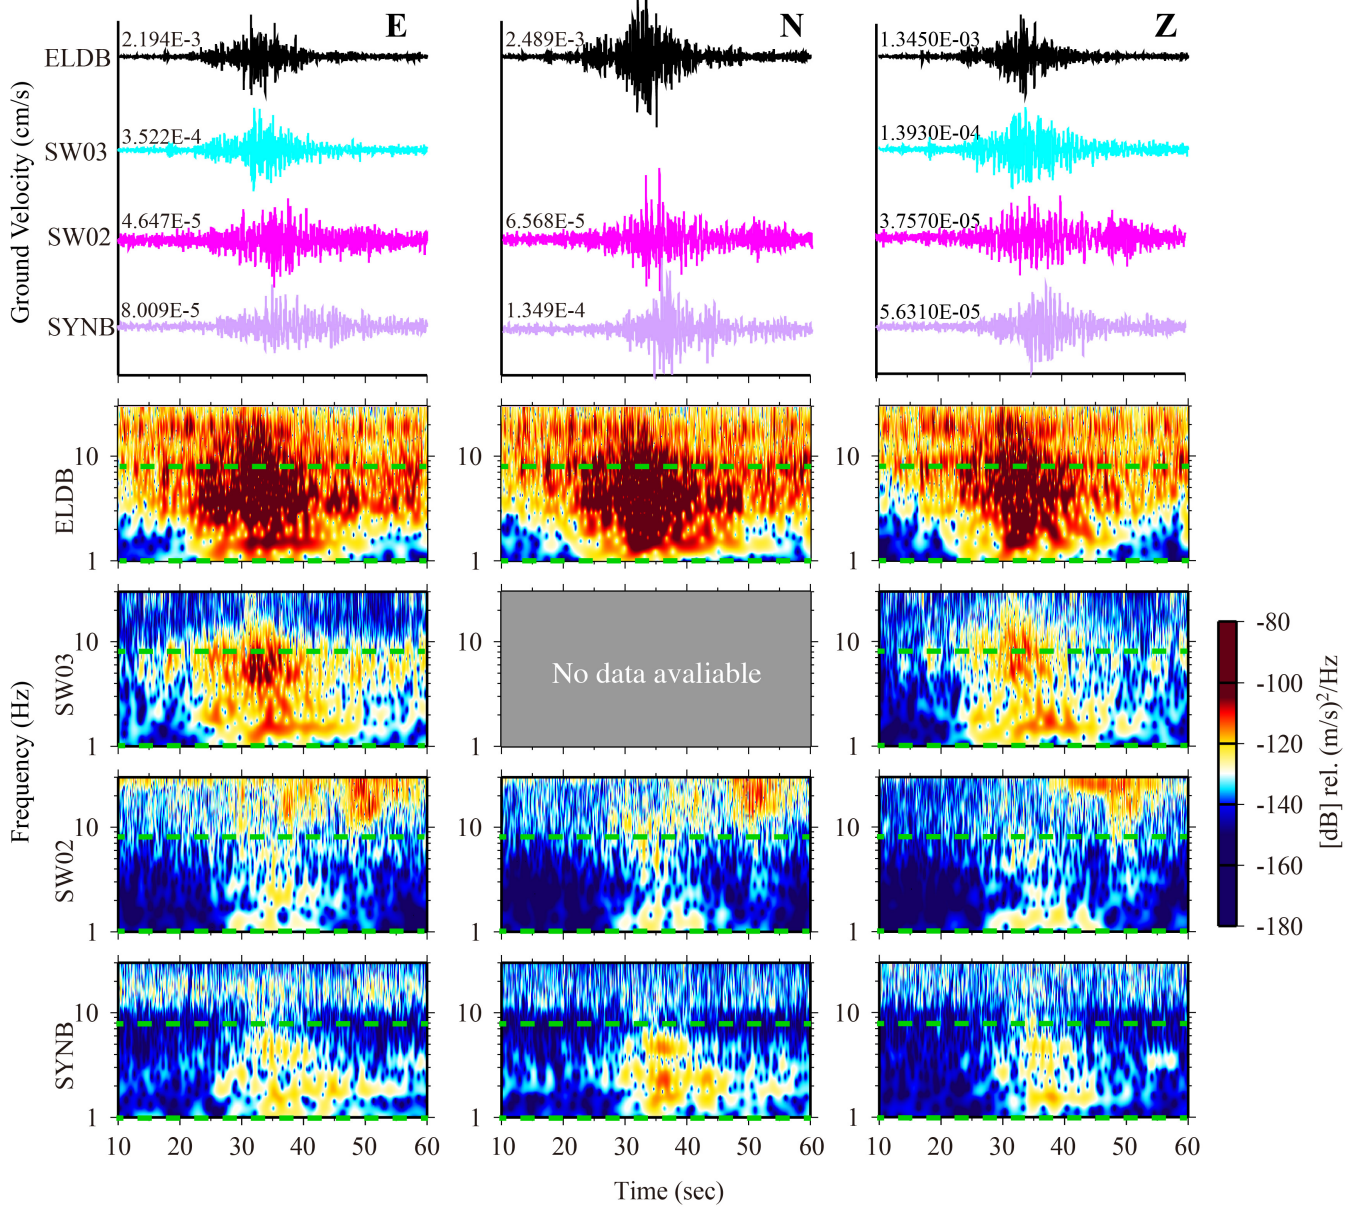



S4 4th October 2016 07:03:10 (UTC)

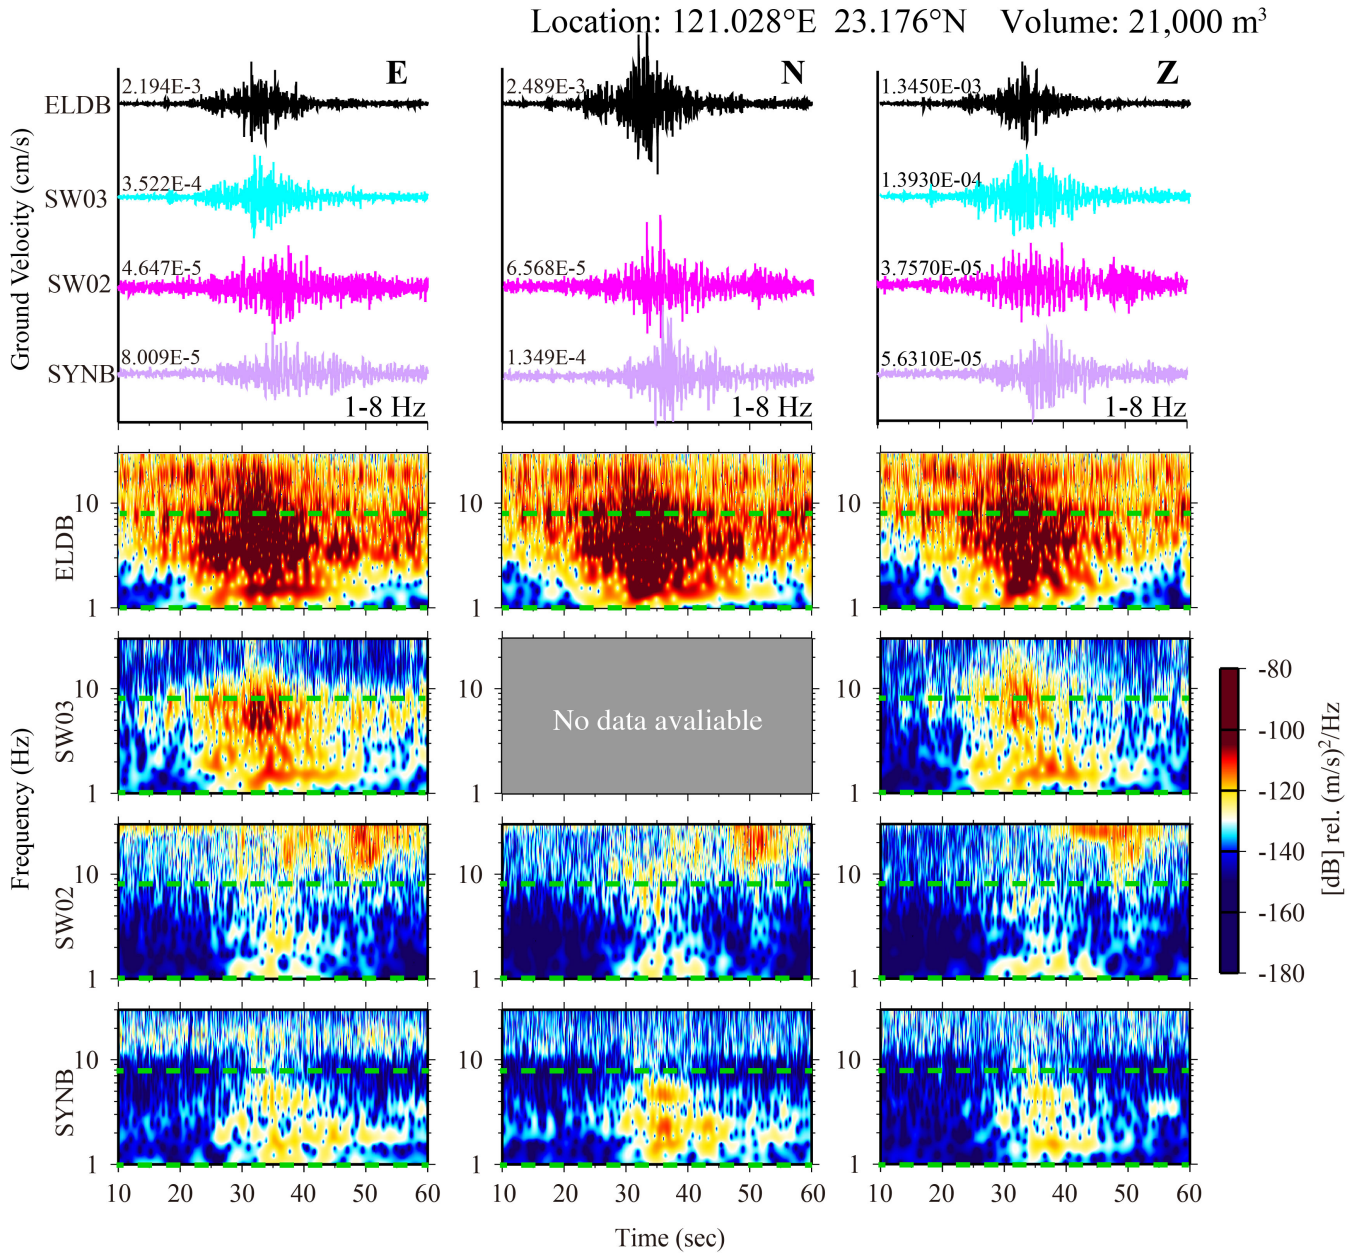

**Figure 3.** Recorded waveform and spectrogram of Event S4. The green dashed line is the range of the bandpass filter (1-8 Hz), which should cover the signals of all stations recorded during the event.

S4: 4-October-2016 07:02:10 (UTC)

**Location Quality Level: A**

**Vertical Envelope Function**

● CC:  $121.03^{\circ}\text{E} \pm 1.94 \text{ km}$   $23.17^{\circ}\text{N} \pm 2.28 \text{ km}$

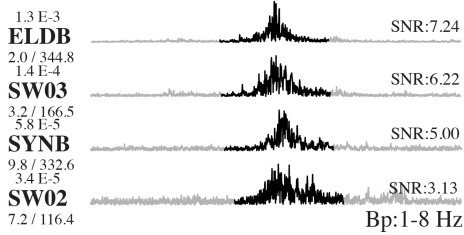

**Horizontal Envelope Function**

● CC:  $121.04^{\circ}\text{E} \pm 6.00 \text{ km}$   $23.18^{\circ}\text{N} \pm 9.32 \text{ km}$

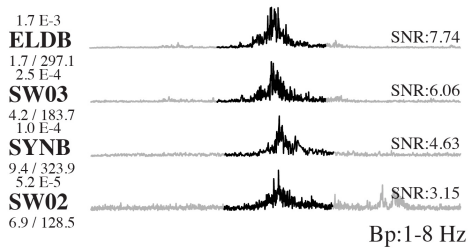

★ True Location    ■ BATS/CWB stations    ■ Temporary seismic stations

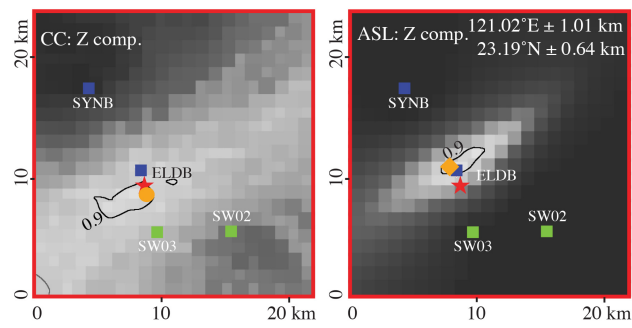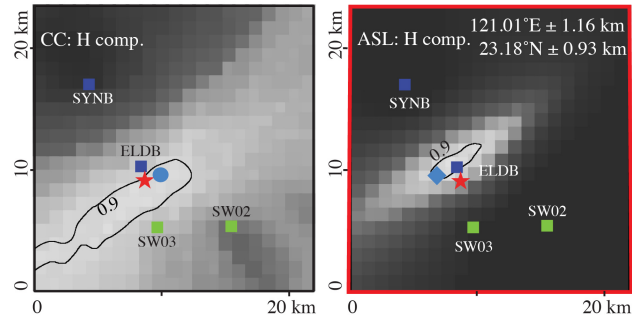

N1: 18-July-2019 01:07:10 (UTC)

**Location Quality Level: B**

**Vertical Envelope Function**

● CC:  $121.33^{\circ}\text{E} \pm 1.81 \text{ km}$   $24.73^{\circ}\text{N} \pm 0.98 \text{ km}$

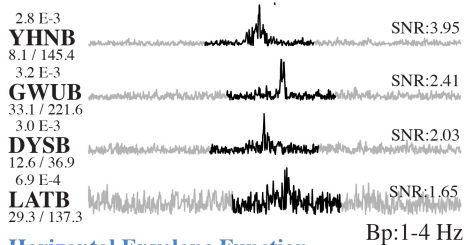

**Horizontal Envelope Function**

● CC:  $121.30^{\circ}\text{E} \pm 4.70 \text{ km}$   $24.71^{\circ}\text{N} \pm 4.00 \text{ km}$

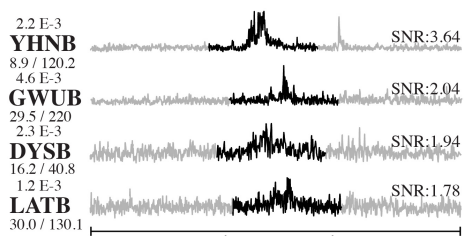

Max. Amplitude(cm/s)  
Station  
Distance(km) / Azimuth(Degree)

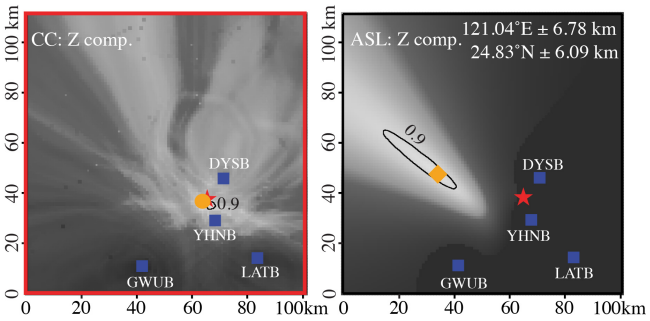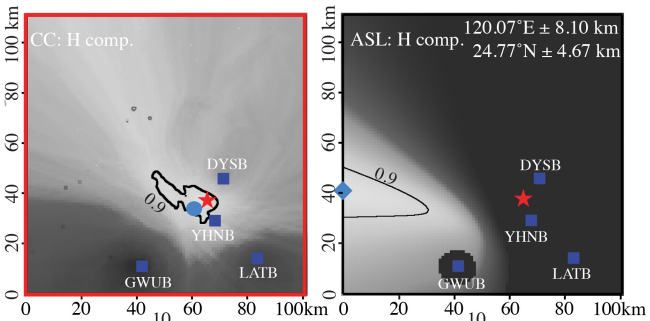

Relative misfit  
0 0.2 0.4 0.6 0.8 1.0

S4: 4-October-2016 07:02:10 (UTC)

**Location Quality Level: A**

**Vertical Envelope Function**

● CC:  $121.03^{\circ}\text{E} \pm 1.94 \text{ km}$   $23.17^{\circ}\text{N} \pm 2.28 \text{ km}$

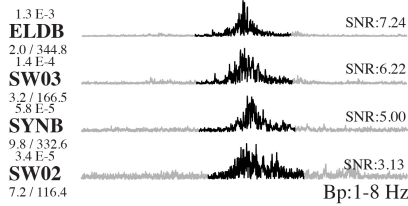

**Horizontal Envelope Function**

● CC:  $121.04^{\circ}\text{E} \pm 6.00 \text{ km}$   $23.18^{\circ}\text{N} \pm 9.32 \text{ km}$

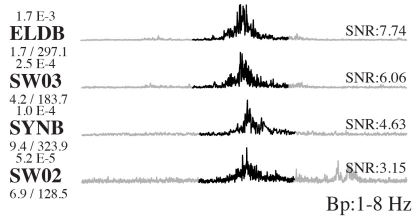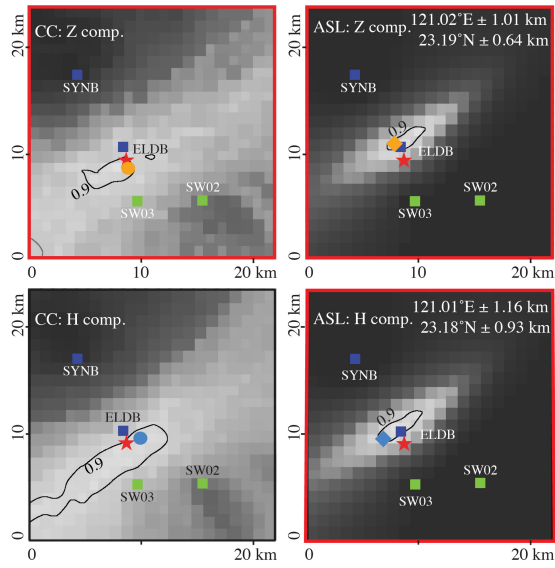

N1: 18-July-2019 01:07:10 (UTC)

**Location Quality Level: B**

**Vertical Envelope Function**

● CC:  $121.33^{\circ}\text{E} \pm 1.81 \text{ km}$   $24.73^{\circ}\text{N} \pm 0.98 \text{ km}$

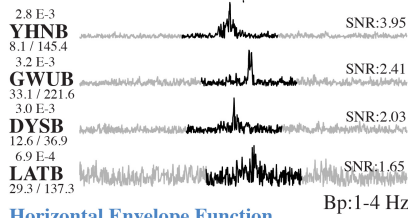

**Horizontal Envelope Function**

● CC:  $121.30^{\circ}\text{E} \pm 4.70 \text{ km}$   $24.71^{\circ}\text{N} \pm 4.00 \text{ km}$

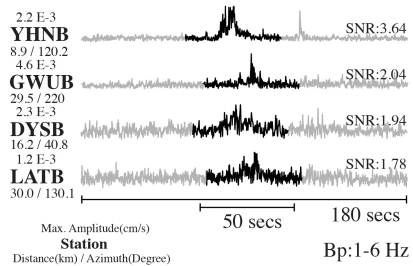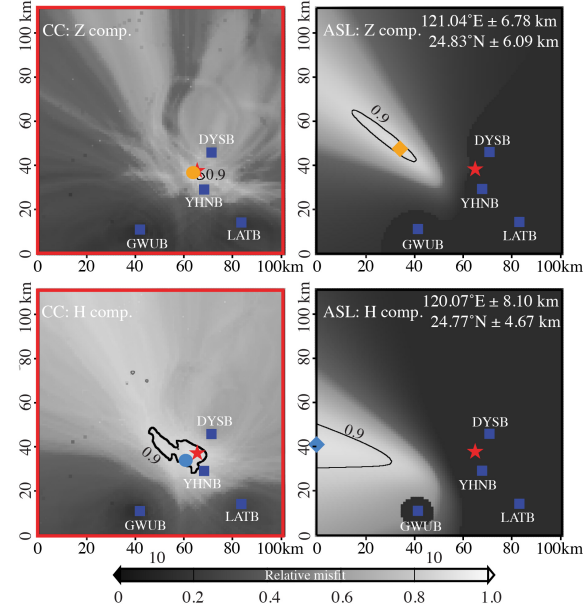

**Figure 4.** The result of CC and ASL in Events S4 and N1. The left panel is the horizontal and vertical envelope function of the detected stations of the Events S4 and N1. The black lines with 50-second signals are used in the CC. The right panel is the result of the CC and ALS with a horizontal and vertical component. The circle and diamond symbols present the best result of the CC and ASL, respectively. The black lines are the contour of a relative misfit with 0.9. The uncertainty of the location is estimated based on the standard deviation of longitude and latitude for the source grid points with the relative misfit higher than 0.95. The red frames highlight the results satisfying the threshold of location uncertainty of 5 km.

(a) ★ True Location    ● CC Vertical    ● CC Horizontal    ◆ ASL Vertical    ◆ ASL Horizontal

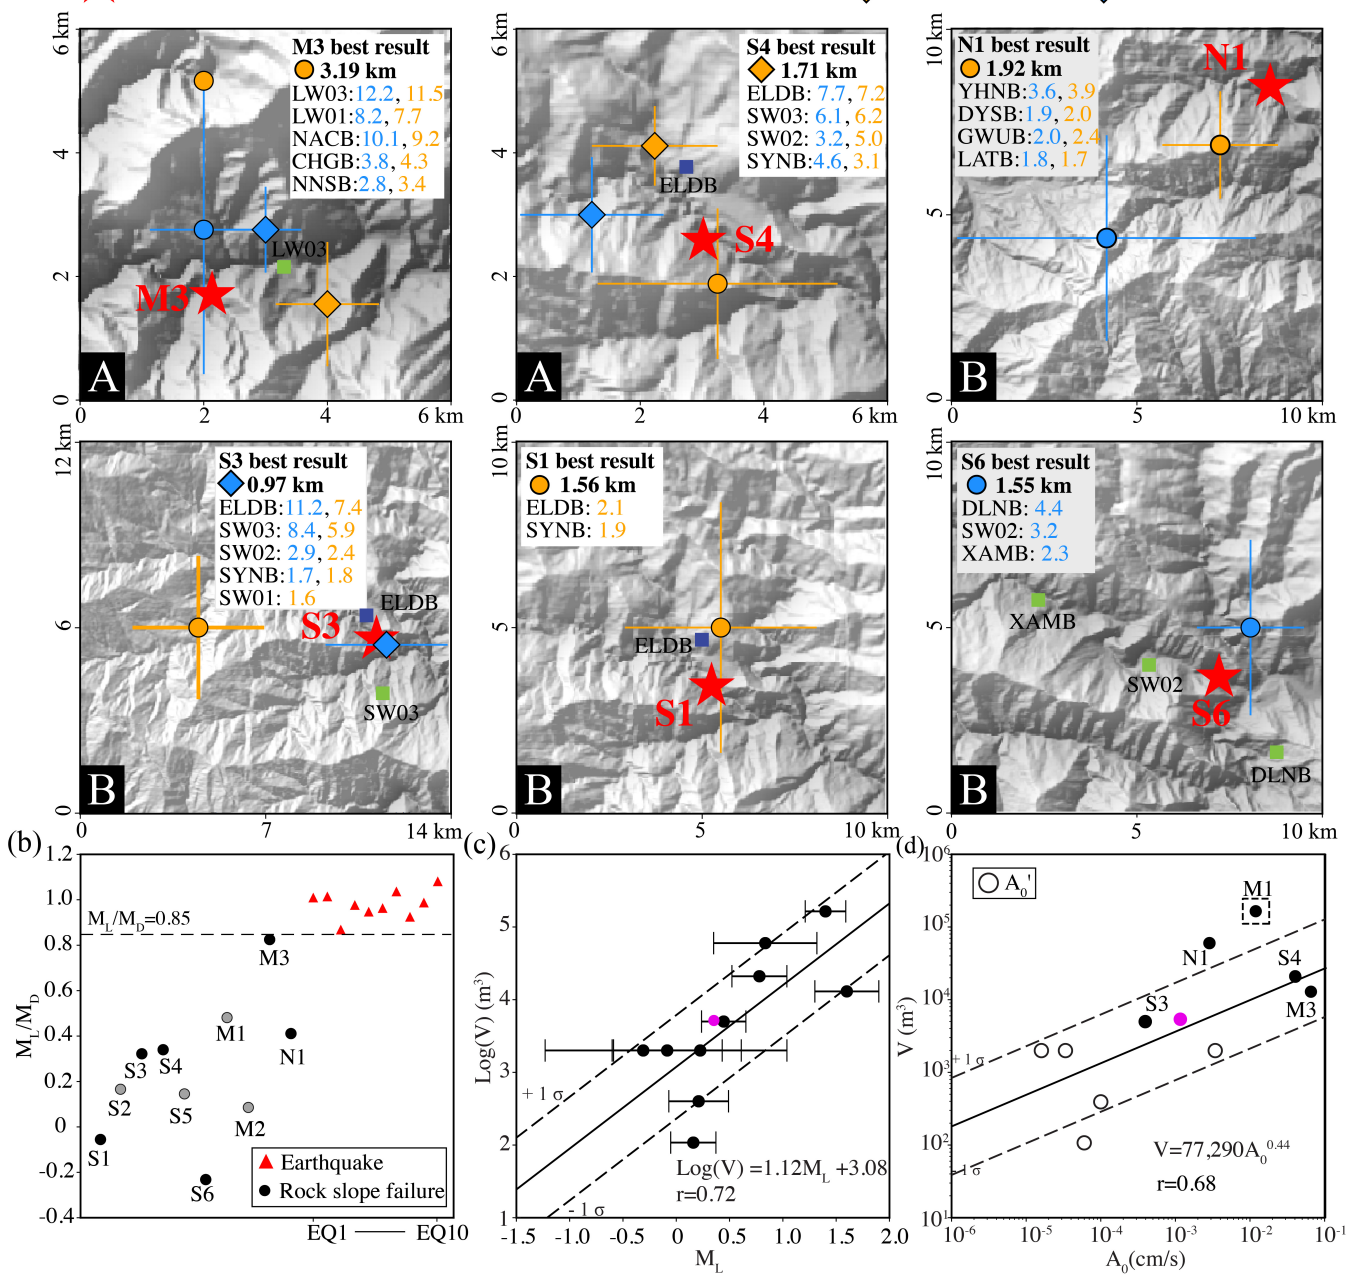



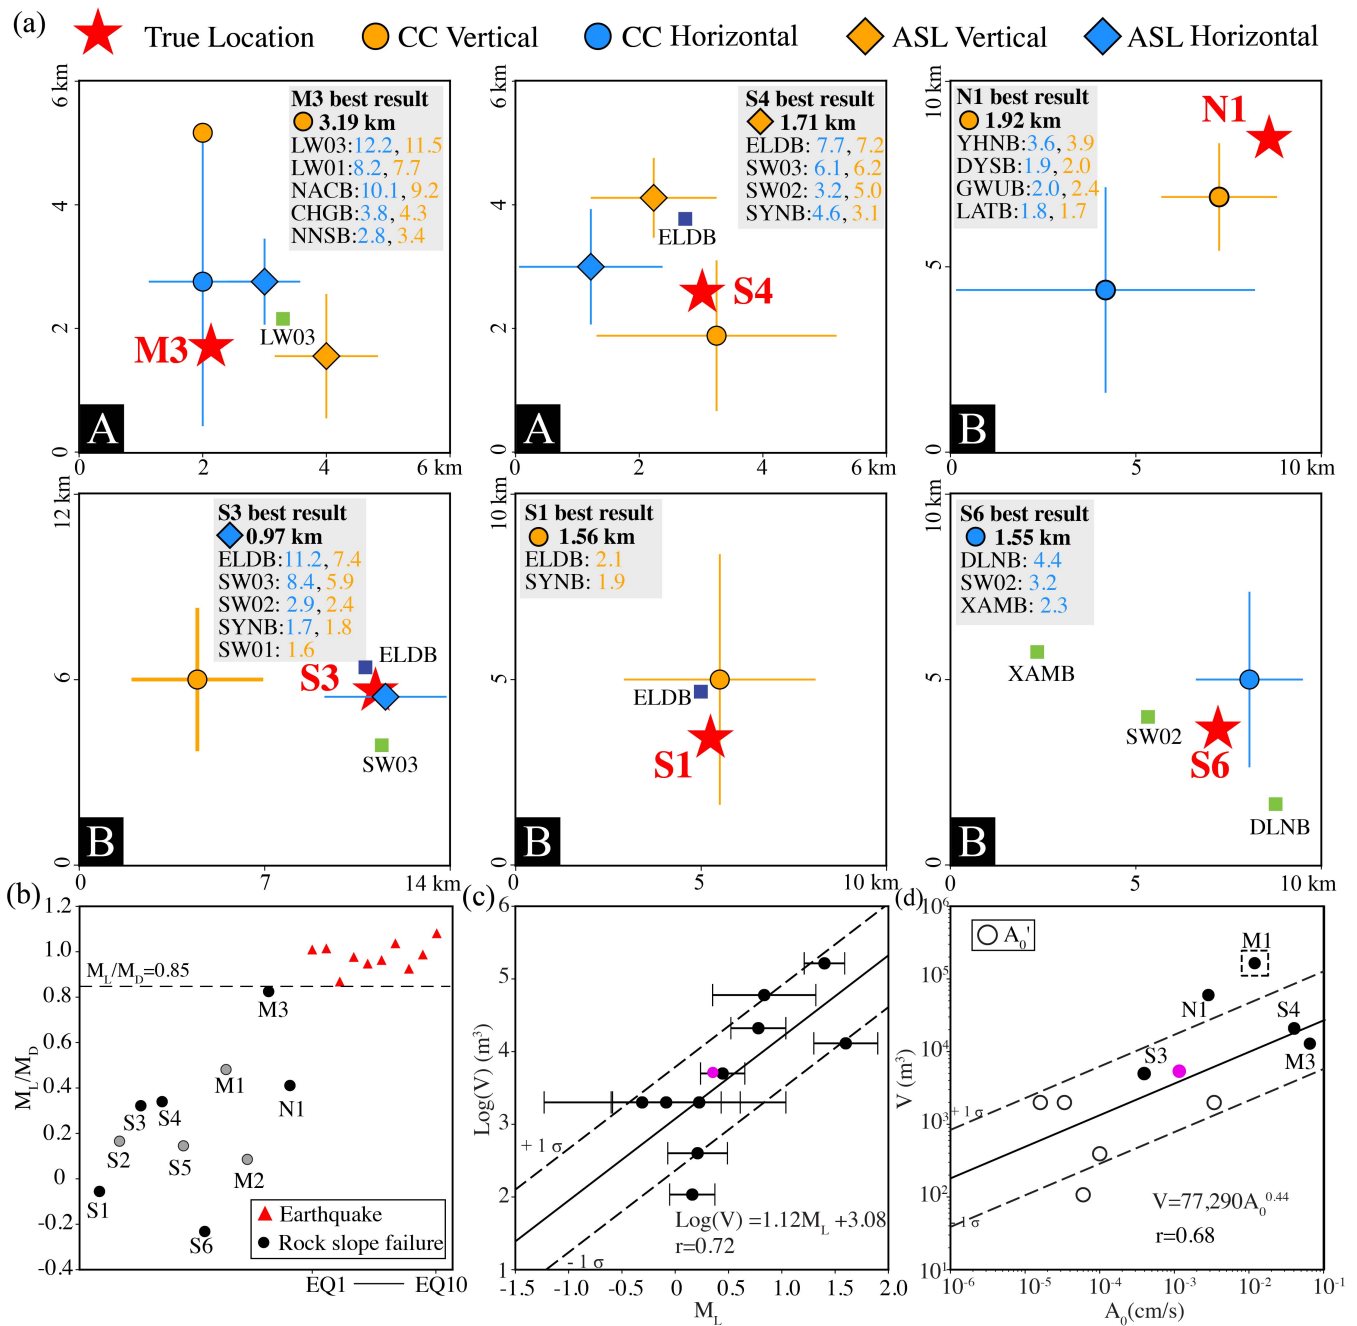

**Figure 5.** Results of the location process by the GeoLoc scheme,  $M_L/M_D$  of the RSFs and earthquakes, scaling of seismic parameters, and source volumes. (a) Results of location quality levels A and B from GeoLoc and their location uncertainties. The number beside the station name shown in the upper right corner is the SNR value for the horizontal (blue) and vertical (orange) envelopes. The circle and diamond symbols are the results of CC and ASL, respectively. The symbol in the grey box is the best result of location, and the value beside the symbol indicates the location error. (b)  $M_L/M_D$  of RSFs and

earthquakes. The black and grey circles are the RSFs with quality levels A and B, and C, respectively. Red triangles show the results of  $M_L/M_D$  for earthquakes. A horizontal dashed line indicates a threshold of  $M_L/M_D$  of 0.85 used in this study. The relationships of (c) the event volume ( $V$ ) and  $M_L$ , and (d) the event volume ( $V$ ) and  $A_0$ . The black circles show the  $A_0$  extracted from the best location result. The open circles are the peak ground velocity ( $A_0'$ ), extracted from the nearest stations. Event M1 is excluded in regression analysis due to its high location error. The purple circle is the recent event on the 12<sup>th</sup> of June 2020. [The data of Digital Elevation Model \(DEM\) of Taiwan is from Government Open Data Platform, Taiwan.](#)

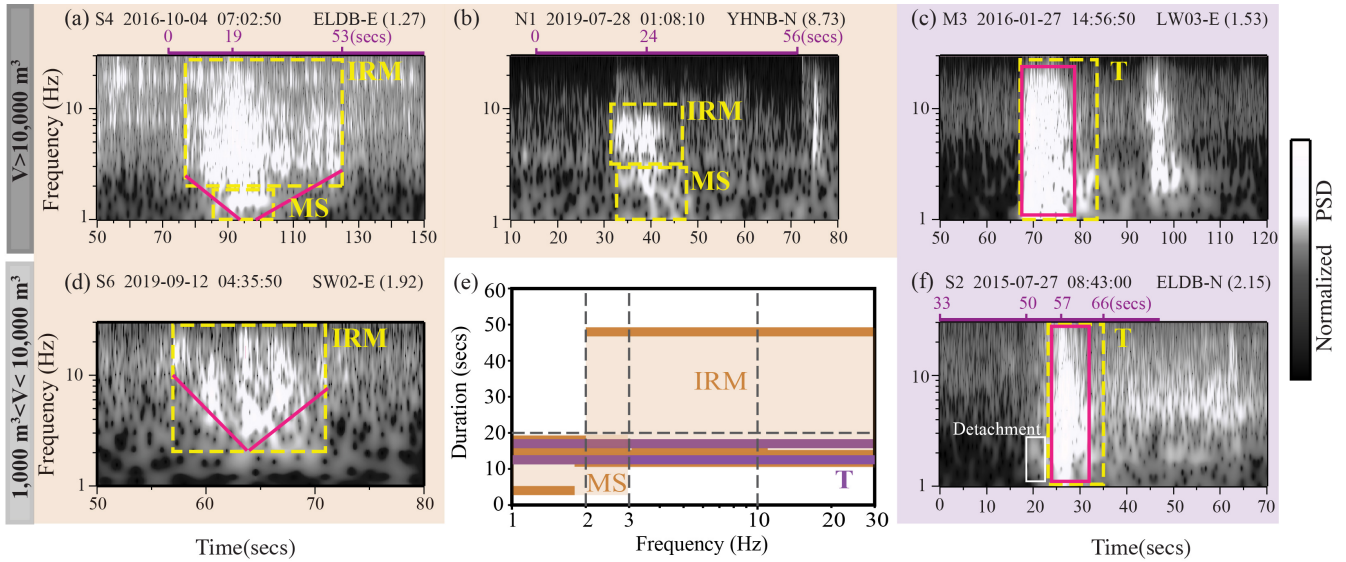

515 **Figure 6.** Spectrogram of five events and classification of physical processes by spectrogram features, frequency, and duration. The rows are separated for the different scales of failure volumes. (a-d, f) Spectrograms of different events. The top left corner is the event number and the starting time of the x-axis. The top right corner is the station name with the component and the epicentral distance (km). The purple bars above (a), (b), and (f) are the durations (secs) of the video with the time points (Table S2). The yellow dashed rectangle is selected for analyzing the range of frequencies and duration for (e) [except Event N1](#). The pink lines are the distinct features of the sliding (IRM and MS) and toppling (T) processes. (e) Sliding and toppling processes are distinguished by the frequency and event duration.

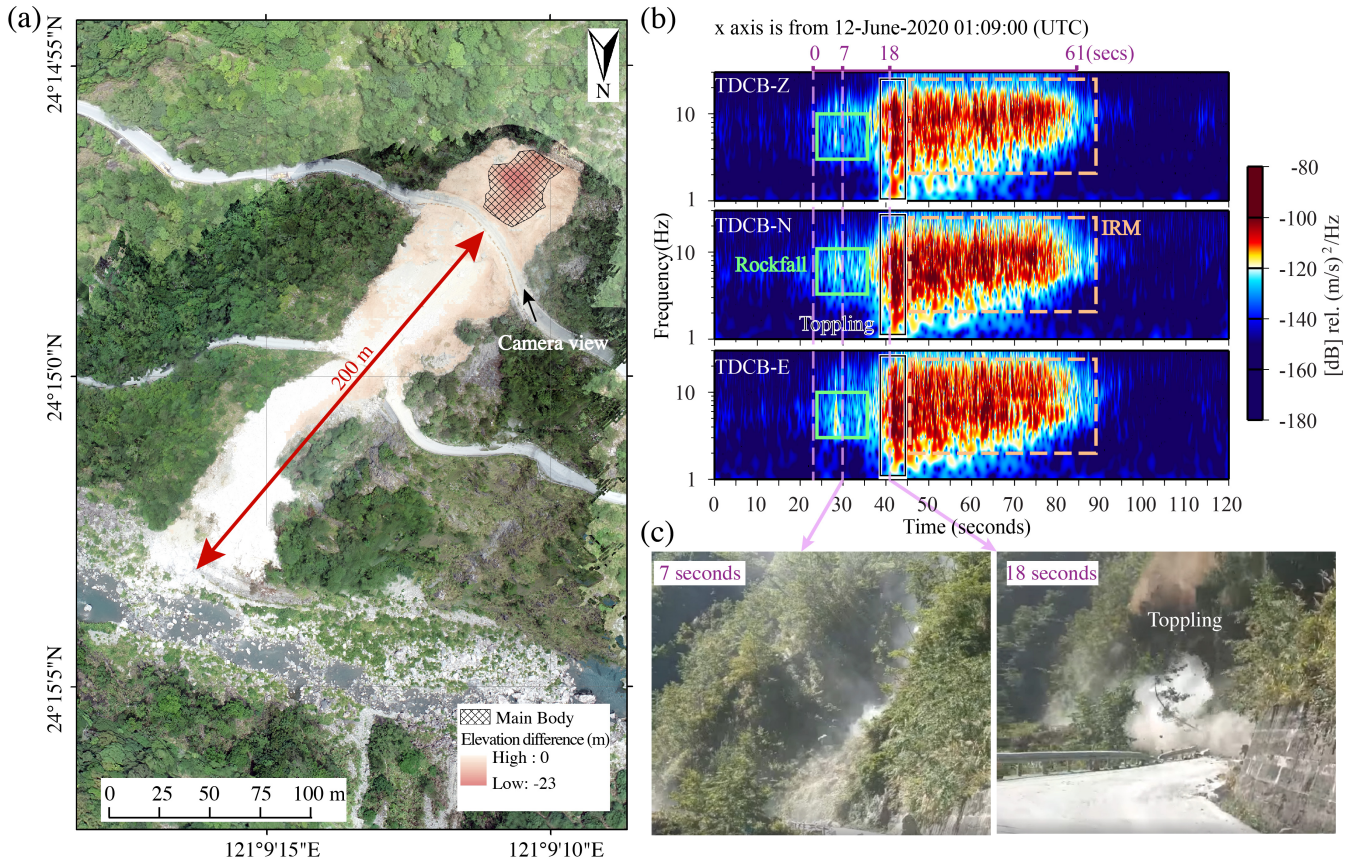

525 **Figure 7.** The field photo, spectrograms, and time-lapse photos form the video of recent RSF on the 12<sup>th</sup> of June 2020. (a)  
 Field photo of the event. The red color scale is the elevation difference between DEM originating from Lidar in 2012 and,  
 the digital surface model(DSM) derived from drone survey after the event. The main body is considered the elevation  
 difference larger than 3m. The black arrow indicates the camera view, and the red arrow is the distance between the road and  
 river bed. (b)The spectrograms of three components. The upper left corner of the spectrograms is the station name with the  
 components. The green, white with black lines, and orange rectangles are the spectrogram features of the physical process  
 530 corresponding to rockfall, toppling (T phase), and complex process of the rock interaction with slope (IRM phase),  
 respectively. The vertical purple dashed line indicates the time points from the video. (c) Time-lapse photos from the video  
 corresponding to the physical process of rockfall (Left panel) and toppling (Right panel). The seconds shown in the top-left  
 corner indicate a time tag in the video.

535
